1      **Engineering microscale systems for fully autonomous intracellular neural interfaces**

2

3              Swathy Sampath Kumar<sup>1</sup>, Michael S. Baker<sup>2</sup>, Murat Okandan<sup>3</sup> and Jit Muthuswamy<sup>1</sup>

4      1 – Biomedical Engineering, School of Biological and Health Systems Engineering, Arizona  
5                                                          State University, Tempe, AZ 85287

6              2 – Mechanical Engineering, Sandia National laboratories, Albuquerque, NM

7                                                          3 – mPower Technology, Inc., Albuquerque, NM 87102

8

9

## 10 **Abstract**

11 Conventional electrodes and associated positioning systems for intracellular recording from  
12 single neurons *in vitro* and *in vivo* are large and bulky, which has largely limited their scalability.  
13 Further, acquiring successful intracellular recordings is very tedious, requiring a high degree of  
14 skill not readily achieved in a typical laboratory. We report here a robotic, MEMS-based  
15 intracellular recording system to overcome the above limitations associated with form-factor,  
16 scalability and highly skilled and tedious manual operations required for intracellular recordings.  
17 This system combines three distinct technologies: 1) novel microscale, glass-polysilicon  
18 penetrating electrode for intracellular recording, 2) electrothermal microactuators for precise  
19 microscale movement of each electrode and 3) closed-loop control algorithm for autonomous  
20 positioning of electrode inside single neurons. Here, we demonstrate the novel, fully integrated  
21 system of glass-polysilicon microelectrode, microscale actuators and controller for autonomous  
22 intracellular recordings from single neurons in the abdominal ganglion of *Aplysia Californica* (n =  
23 5 cells). Consistent resting potentials (< -35 mV) and action potentials (> 60 mV) were recorded  
24 after each successful penetration attempt with the controller and microactuated glass-polysilicon  
25 microelectrodes. The success rate of penetration and quality of intracellular recordings achieved  
26 using electrothermal microactuators were comparable to that of conventional positioning  
27 systems. The MEMS-based system offers significant advantages: 1) reduction in overall size for  
28 potential use in behaving animals, 2) scalable approach to potentially realize multi-channel  
29 recordings and 3) a viable method to fully automate measurement of intracellular recordings.  
30 This system will be evaluated *in vivo* in future rodent studies.

## 31 **Key words**

32 MEMS; intracellular recording; brain implant; robot; microelectrode array; microactuator; neural  
33 recording

34

## 35 **Introduction**

36 Intracellular recordings from single neurons provide functional information at the highest  
37 spatial and temporal resolution among known techniques for brain monitoring. They offer  
38 several significant advantages over extracellular recordings: 1) ability to record sub-threshold  
39 dynamic events such as synaptic potentials and membrane potential oscillations, which have  
40 been identified to play important roles in neural coding [1]–[4], 2) large dynamic range of signal  
41 (80-100 mV) compared to signal recorded with extracellular electrodes (hundreds of  $\mu$ V to 1  
42 mV) and 3) ability to obtain structural information (through dye labeling, passive membrane  
43 properties) about the neurons being recorded from *in vivo*, thereby allowing correlation of  
44 structure with function at single neuron resolution. A more recent alternative approach to  
45 intracellular recording is voltage imaging with genetically encoded voltage indicators (GEVIs).  
46 Although current GEVIs can image sub and supra threshold events from neuronal ensembles at  
47 single neuron resolution, they do not match the temporal resolution and sensitivity of the  
48 intracellular recording technique [5]. Thus, the quality of information obtained with intracellular  
49 recordings is unparalleled and fundamental to our understanding of neural computation and  
50 function.

51 Traditionally, glass micropipettes integrated with cumbersome micromanipulators and  
52 bulky positioning systems have been used to record intracellularly. Although they have been  
53 extensively used for in vitro studies, their use in in vivo studies has been limited due to their  
54 large form factor. The conventional intracellular recording system has significant limitations: 1)  
55 due to the large form factor of the technologies involved, recordings have mostly been obtained  
56 from anesthetized animals with the exception of a few studies [6], [7], 2) recordings are obtained  
57 from one neuron at a time (serial recording), 3) their use requires extraordinary manual skill and  
58 tedious operations, which results in a long training period for neurophysiologists, 4) duration of  
59 recordings obtained are typically short (45-60 min in anesthetized animals, 5-30 min in awake  
60 head-fixed animals [8], [9]), often due to mechanical disruptions at the electrode-cell interface.  
61 These challenges have impeded chronic intracellular recording studies from a population of  
62 neurons in anesthetized and awake animals. The ability to record intracellularly from neuronal  
63 networks in freely behaving animals would allow correlation of ultra-high resolution functional  
64 information with modulative behavior and accelerate neurophysiological studies on mechanisms  
65 of neuronal function and dysfunction.

66 Several approaches have been reported recently to address some of the limitations of  
67 manual operations in the conventional intracellular recording system. Recently, automated  
68 systems have been developed to reduce the 'art' in the process of intracellular recording in vivo  
69 [10]–[12]. Kodandaramiah and colleagues [10] developed a closed-loop control system that  
70 used a temporal sequence of electrode impedance changes as a feedback signal to automate  
71 movement of electrode and whole-cell patching of neurons in cortex and hippocampus of  
72 anesthetized, head-fixed mice. They recently improved the algorithm to automate localization of  
73 pipette to deep cortical nuclei through autonomous detection and lateral navigation around  
74 blood vessels and obtained high-yield (10%) thalamic whole cell recordings [13]. Desai et al.[12]  
75 and Ota et al.[11] developed similar algorithms to automate cortical whole-cell patching in  
76 awake, head-fixed, behaving mice and sharp micropipette recording in anesthetized, head-fixed  
77 mice respectively.

78 Conventional techniques to achieve long-duration intracellular recordings in vivo include  
79 draining of cerebrospinal fluid, rigid fixation of cranium to recording apparatus and passive  
80 stabilization using floating micropipettes [14]. Fee [15] developed a novel control strategy that  
81 compensated for residual brain motion in awake, head-fixed rats due to cardiac and respiratory  
82 pulsations as well as spontaneous movement of animal. Through dynamic stabilization of a  
83 sharp micropipette relative to the brain, intracellular recordings were obtained for ~9 min from  
84 resting rats (<10 s with no active stabilization) and ~3 min from active rats. Although  
85 successful, all the above technologies used bulky microdrive systems and glass micropipettes,  
86 which prevented their immediate translation to freely behaving animals and feasibility of parallel  
87 intracellular recordings.

88 In the first of its kind, Lee et al [16] introduced a technique to record intracellularly from  
89 motor cortex and hippocampus of non-head-fixed, freely moving rats. They developed and used  
90 a head-mounted device consisting of a miniaturized recording headstage and a miniaturized  
91 motor integrated with a patch pipette holder. Mechanical stabilization was achieved by  
92 anchoring the recording pipette to the skull using dental acrylic after establishing a whole-cell  
93 recording [16], [17]). Recently, they extended the technique to mice by using a UV- transparent  
94 collar and a UV cured adhesive for pipette fixation[18]. Long et al [4] developed a miniaturized  
95 linear microdrive to record intracellularly from freely moving song birds using sharp

96 micropipettes. Although these groups recorded for long durations (mean recording time of 10  
97 min) in freely behaving animals, use of glass micropipettes limited recording to one neuron per  
98 animal. Further, there was no mechanism to reposition electrode upon loss of recordings.

99 Several groups have developed novel, metal-based, micro/nanoscale electrodes to  
100 potentially realize multi-channel intracellular recordings [19]–[23]. These electrodes successfully  
101 recorded synaptic and intracellular-like or full-blown action potentials in neuronal cultures and  
102 brain slices, however they have not been demonstrated in vivo. Recently, Moore et al.[24]  
103 showed intracellular-like signals recorded from dendritic arbors in cortex of freely moving rats  
104 using chronically implanted tetrodes. Although they recorded intracellular-like signals for several  
105 hours to days for the first time, the success-rate of the technique (13%) was relatively low.

106 Therefore, there is a critical need for a technology that enables multi-channel  
107 intracellular recordings from unrestrained, behaving animals, which is currently unavailable. We  
108 report here a novel microscale, robotic, intracellular positioning and recording system as a first  
109 step towards addressing the above need. We report successful demonstration of (1) MEMS-  
110 based technologies to significantly reduce the form factor of the recording electrode as well as  
111 the positioning system required to move the intracellular electrodes, thereby addressing the size  
112 and scalability challenges of the conventional electrode navigation systems and (2) closed loop  
113 control technology to automate electrode movement to seek and penetrate neurons, and  
114 maintain intracellular recordings that will minimize the training barriers for personnel using such  
115 systems. In this study, we demonstrate the ability of this miniaturized MEMS based system to  
116 autonomously isolate, impale and record intracellular signals from single neurons in the  
117 abdominal ganglion of *Aplysia Californica*. Future studies will test this system in vivo.

#### 118 Microscale intracellular recording system

119 The MEMS sub-systems of the proposed intracellular recording system are illustrated in  
120 Fig. 1. The two key sub-systems are: (a) glass-polysilicon microelectrode - polysilicon  
121 microelectrode integrated with a miniaturized glass micropipette to penetrate and record  
122 intracellular potentials from single neurons (Fig. 1A & 1C) and (b) electrothermal microactuators  
123 for precise microscale navigation and positioning of glass-polysilicon microelectrode inside  
124 single neurons (Fig. 1A & 1B). This system is integrated with a closed-loop control algorithm to  
125 enable autonomous movement of microelectrode, isolation and penetration of neurons (Fig. 8).

A

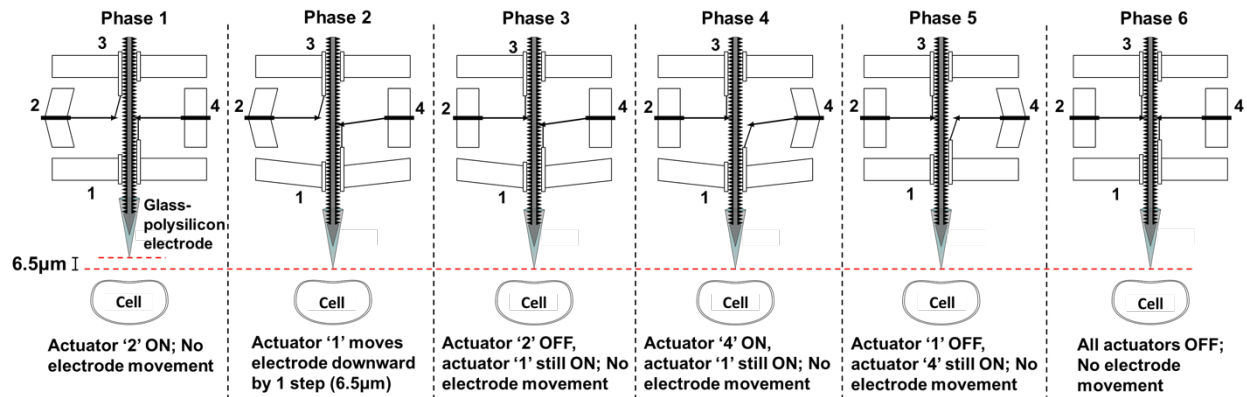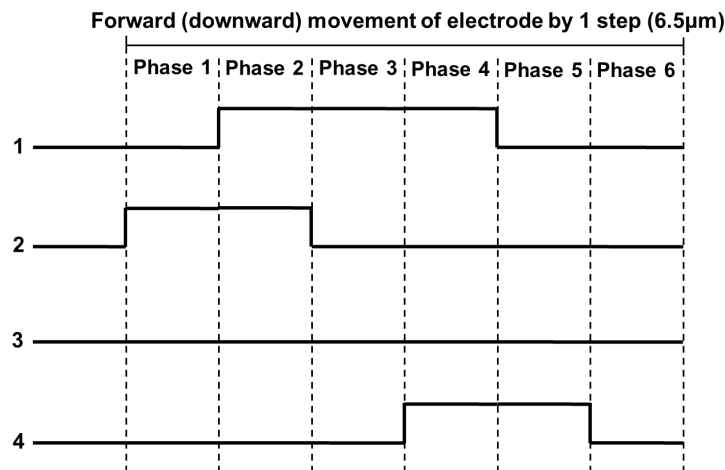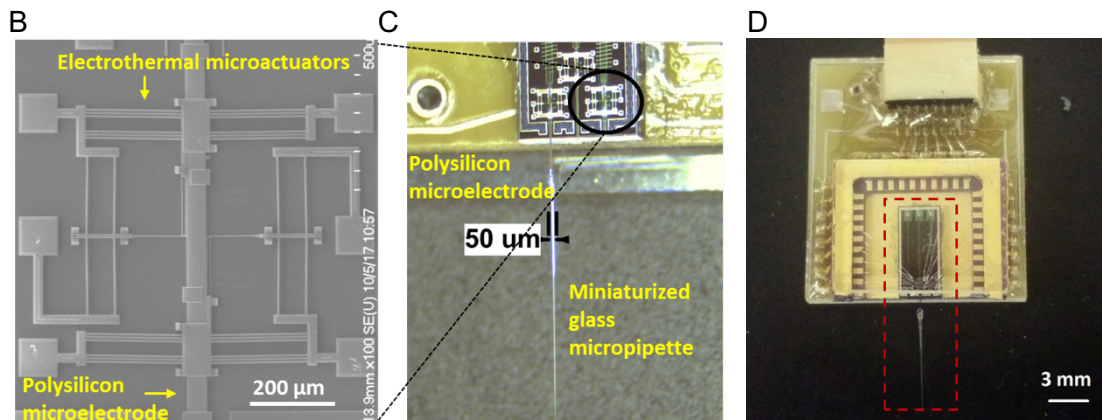

**Fig.1:** MEMS-based system for microscale actuation and intracellular recording. (A) Mechanism of actuation using chevron-peg electrothermal microactuators - 6 distinct phases in the forward (downward) actuation towards a neuron by 1 step (6.5  $\mu$ m) using the 4 different electrothermal microactuators (1 - Forward drive, 2 - Disengage reverse, 3 - Reverse drive, 4 - Disengage forward). Their corresponding voltage waveforms are shown below. (B) Micrograph of the electrothermal microactuators integrated with

the polysilicon microelectrode to enable cell penetration. (C) Integrated glass-polysilicon microelectrode for intracellular recording. (D) The integrated MEMS-based intracellular recording system.

## 126 Principle of actuation of the electrothermal microactuators

127 Bi-directional movement of each glass-polysilicon microelectrode is enabled by the  
128 chevron-peg mechanism reported earlier [25]. The mechanism of forward (or downward)  
129 actuation of the electrode is shown in Fig. 1A. Briefly, the polysilicon microelectrode has a set of  
130 teeth spaced 6.5  $\mu\text{m}$  apart on both sides along the length of the electrode. A peg/pawl engages  
131 the teeth and holds the microelectrode in position during rest conditions. Each microelectrode is  
132 coupled with two pairs of electrothermal actuators. The 'forward drive', working in conjunction  
133 with 'disengage forward' and 'disengage reverse' actuators enables forward (downward)  
134 movement, while the 'reverse drive', working in conjunction with 'disengage forward' and  
135 'disengage reverse' actuators enables reverse (upward) movement of the microelectrode. Each  
136 actuator is composed of an array of doped polysilicon beams anchored at two ends and  
137 attached to a central shuttle as shown on either side of the polysilicon microelectrode in Fig. 1B.  
138 Application of voltage pulses typically 6-10 V amplitude causes thermal expansion of the  
139 beams, which causes displacement of the shuttle. The central shuttles of the drive and  
140 disengage actuators are both connected to a peg in an L-shaped arrangement to facilitate  
141 movement. A pre-programmed set of pulsed voltage waveforms applied to these actuators allow  
142 movement of the microelectrode in forward/reverse direction. The voltage waveforms for the  
143 actuators to enable forward movement of the microelectrode by one step (6.5  $\mu\text{m}$ ) are also  
144 shown in Fig. 1A. Details on optimal parameters for reliable activation of the microactuators and  
145 the microstructural details of the assembly can be found in our prior report [25].

146

## 147 **Results**

148

### 149 Intracellular recordings using glass-polysilicon (GP) microelectrode

150 In this study, we report a novel glass-polysilicon (GP) microelectrode for intracellular  
151 recording. The GP microelectrodes consistently recorded good quality resting potentials (RP < -  
152 35 mV) and/or action potentials (AP >70 mV) from neurons in the abdominal ganglion of *Aplysia*  
153 *Californica*, similar to conventional glass micropipettes (Fig. 2A). The quality of signals recorded  
154 with the GP microelectrode from abdominal ganglion neurons was comparable to recordings  
155 acquired using conventional glass micropipettes, as shown in Fig. 2B (from n = 3 distinct GP  
156 microelectrodes). Unpaired *t*-test comparing the means of signal (RP and peak-peak AP)  
157 amplitudes recorded with the two electrodes showed no statistically significant difference  
158 between them (RP:  $p > 0.5$  and AP:  $p > 0.2$ ). The GP microelectrodes also recorded good quality  
159 resting potential ( $V_m = -74$  mV) from a cell in the motor cortex of an anesthetized rat at a depth  
160 of 800  $\mu\text{m}$  from the surface of the brain (Fig. 2C).

161

162

163

164

165

A

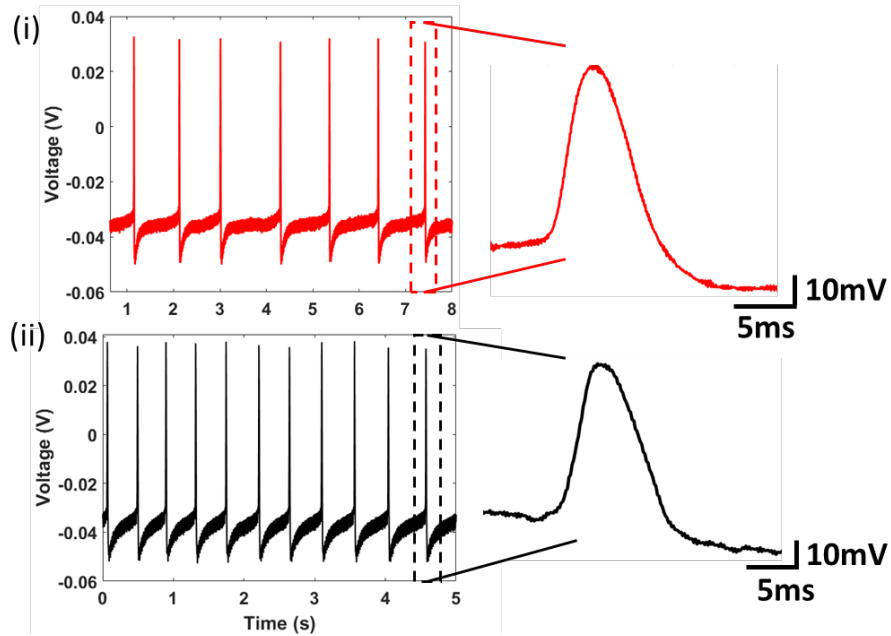

B

|                                | Conventional glass micropipettes | Glass-polysilicon microelectrodes |
|--------------------------------|----------------------------------|-----------------------------------|
| Avg. amp. of RP (mV)           | -38.37                           | -41.49                            |
| Avg. peak-peak amp. of AP (mV) | 86.47                            | 88.20                             |

C

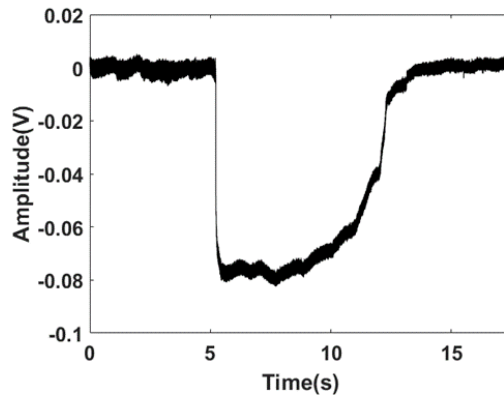

**Fig.2:** Intracellular recordings using the glass-polysilicon (GP) microelectrode. (A) (i) Intracellular recordings (RP = -35.5 mV, peak-peak AP = 80.1 mV) obtained from an isolated abdominal ganglion neuron in *Aplysia* using a conventional glass micropipette and (ii) using GP microelectrode (RP = -38.8 mV, peak-peak AP = 85.5 mV). (B) Comparison of the quality of intracellular signals using GP microelectrodes with those obtained using conventional glass micropipettes ( $n=3$  neurons) showing no significant difference (RP:  $p>0.5$ , AP:  $p>0.2$ ). (C) In vivo intracellular recording (RP = -74 mV) obtained from the motor cortex of a rat using a GP microelectrode. (RP: Resting Potential, AP: Action Potential).

166 Electrical impedance of glass-polysilicon (GP) microelectrode

167 The closed loop control for autonomous isolation and penetration of neurons uses DC  
 168 electrical impedance of the tip of the electrode and measured voltage at the tip of the electrode  
 169 as feedback variables (Fig. 8). A model of the glass-polysilicon (GP) microelectrode-neuron  
 170 interface (Fig. 3A, B) was constructed to predict the electrical impedance of this electrode at  
 171 DC. All simulations were done using Simulink™ (Mathworks Inc., Natick MA). The following  
 172 parameters were used for the model: 1) neuronal membrane resistance ( $R_m$ ) of 25 M $\Omega$  and  
 173 membrane capacitance ( $C_m$ ) of 500 pF, obtained from prior studies by Hai et al. [27] and  
 174 Ungless et al. [28]; 2) Miniaturized pipette tip resistance ( $R_{tip}$ ) of 30 M $\Omega$  and distributed  
 175 capacitance ( $C_d$ ) of 15 pF, as measured from voltage responses of conventional micropipettes  
 176 with silver/silver chloride electrode to current pulses of 1 nA ( $R_{tip}$  = steady-state value of voltage  
 177 response to 1 nA current injection and  $C_d$  = measured time-constant/ $R_{tip}$ ); 3) Polysilicon charge  
 178 transfer resistance ( $R_{ct}$ ) of 2.35 G $\Omega$ , double layer capacitance ( $C_{dl}$ ) of 3.95 nF and solution  
 179 resistance ( $R_s$ ) of 16 K $\Omega$ , were obtained from the electrochemical impedance spectrum of a  
 180 polysilicon microelectrode measured with a electrochemical workstation (CH Instruments Inc.)  
 181 and subsequently modeled using ZSimpWin™ software.

182 The expected voltage responses of the electrode to a 1 nA pulse (100 msec ON, 2 sec  
 183 OFF) were obtained from the model for 2 different values of seal resistance ( $R_{seal}$ ) (Fig. 3C). For  
 184 a  $R_{seal}$  of 0.1 M $\Omega$ , which simulates a condition of electrode being at a distance from the cell, the  
 185 response had an initial rapid decrease in voltage, followed by a slower decrease (Fig. 3C(i)).  
 186 The rapid decrease with a time constant ( $\tau_1$ ) of 0.5 msec corresponds to the RC combination at  
 187 the miniaturized glass micropipette ( $R_{tip} \cdot C_d$ ). The subsequent slower decrease with a large time  
 188 constant ( $\tau_2$ ) corresponds to the RC combination at the polysilicon-electrolyte interface ( $R_{ct} \cdot C_{dl}$ ).  
 189 Therefore, the electrical impedance of the tip of the electrode for this condition is proportional to  
 190 the magnitude of voltage response after the first rapid decrease (at least  $3 \cdot \tau_1$ ) for the initial  
 191 steady state).

192

193

A

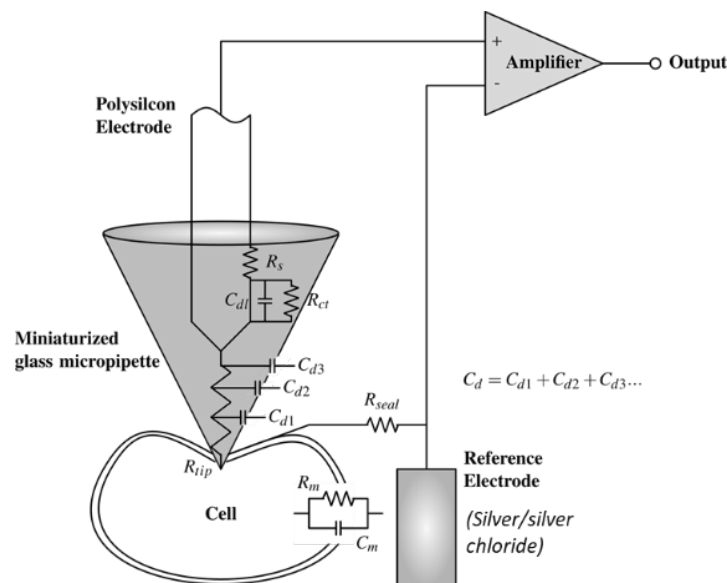



B

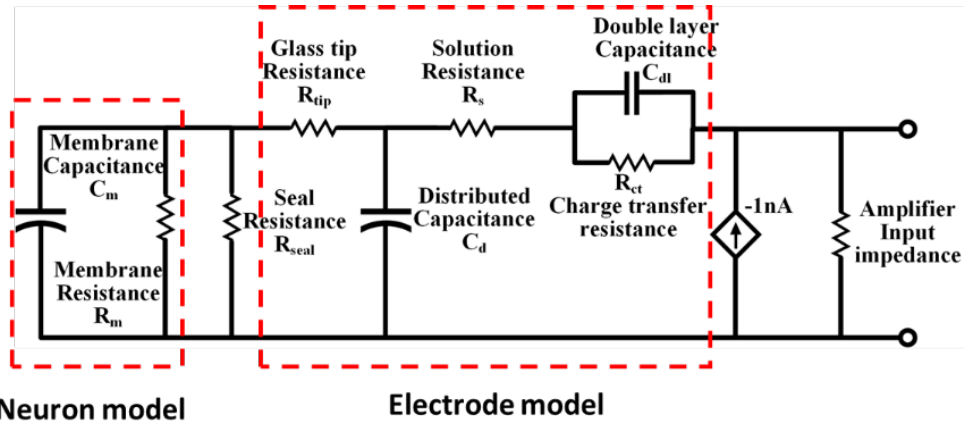

C

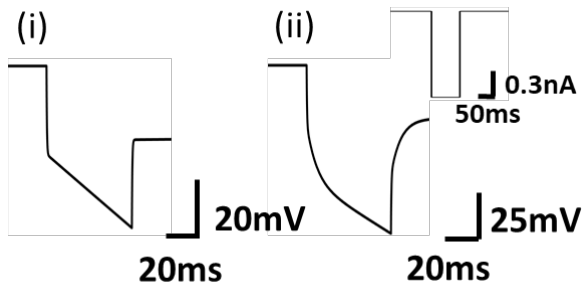

D

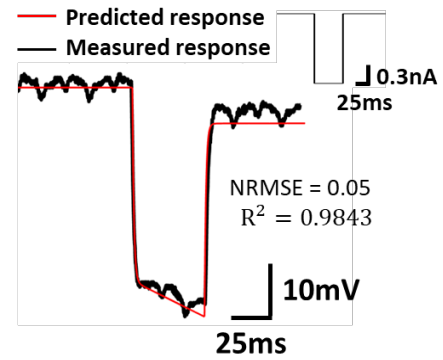

E

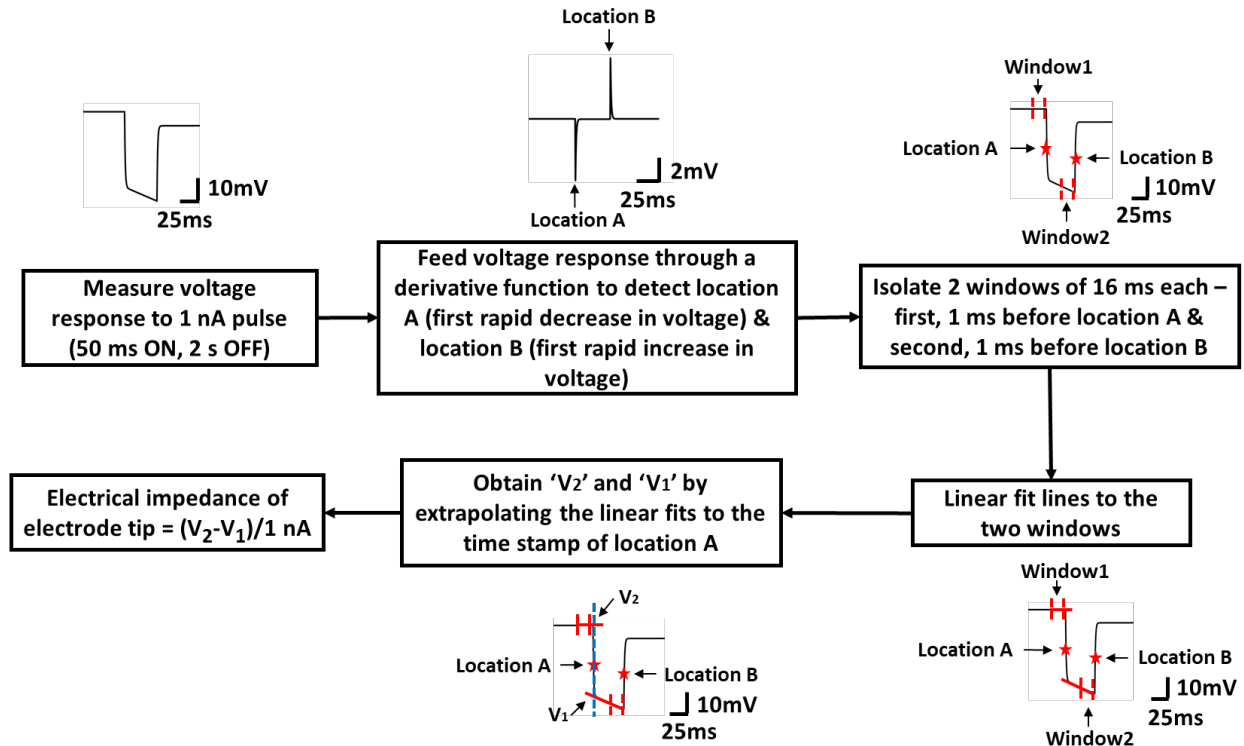

**Fig.3:** Modeling the electrical impedance of glass-polysilicon (GP) microelectrode. (A) Schematic representing the elements of the microelectrode-neuron interface. (B) Equivalent electrical circuit of the electrode-neuron interface.  $R_{seal}$  represents the degree of coupling between the electrode and neuronal membrane. (C) Expected (ideal) voltage responses of this electrode to application of a 1 nA current pulse (shown in inset) for 2 conditions: (i) Seal resistance ( $R_{seal}$ ) of 0.1 M $\Omega$  (simulating a condition of electrode away from neuron), (ii) Seal resistance ( $R_{seal}$ ) of 1 G $\Omega$  (simulating a condition of electrode inside neuron). (D) measured voltage response of a GP microelectrode to the application of a 1 nA pulse, matches well with the response predicted by the model for  $R_{seal} = 0.1$  M $\Omega$ . (E) Sequence of steps involved in quantitative measurement of electrical impedance of the tip of the glass-polysilicon microelectrode.

194 A  $R_{seal}$  of 1 G $\Omega$  simulates a condition of the electrode inside a cell. The corresponding  
 195 voltage response had three distinct time constants as shown in Fig. 3C(ii). The first time  
 196 constant corresponds to the RC combination at the miniaturized glass micropipette  $\tau_a = R_{tip}.C_d$ ,  
 197 the second decrease with a time constant of 12 msec is due to the cell membrane  $\tau_b = R_m.C_m$   
 198 and a third slow decrease is due to polysilicon-electrolyte interface  $\tau_c = R_{ct}.C_{dl}$ . Thus, the first  
 199 and second decreases in the voltage response correspond to events that occur at the tip of the  
 200 electrode due to interactions between the electrode and cell, while the third decrease  
 201 corresponds to events at the polysilicon-electrolyte interface. For this condition, the electrical  
 202 impedance of the tip of the electrode is proportional to the magnitude of voltage response after  
 203 the second decrease (at least  $3 * R_m.C_m$ ) for the RC network to reach steady state).

204 The voltage response predicted by the model for  $R_{seal} = 0.1$  M $\Omega$  was validated  
 205 experimentally by measuring the response of an electrode to a 1 nA current pulse (50 msec ON,  
 206 2 sec OFF) applied via the intracellular amplifier. The measured response closely followed the  
 207 predicted response ( $R^2 = 0.98$  and normalized root-mean-square error, NRMSE = 0.05) (Fig.  
 208 3D). NRMSE was computed by dividing the RMSE by the range of the predicted response.

## 209 Quantitative measurement of electrical impedance of the tip of the electrode

210 Based on the predicted voltage responses of the GP microelectrode shown in Fig. 3C,  
211 we developed an algorithm for quantitative measurement of electrical impedance of the tip of  
212 the electrode that is illustrated in the schematic of Fig. 3E. The duration of 1 nA current pulses is  
213 set to at least 50 msec to allow for the RC combinations of  $R_{tip} \cdot C_d$  and  $R_m \cdot C_m$  to reach steady  
214 state. The response to the current pulse is fed through a derivative function to capture the  
215 locations of the first decrease and first increase in voltage. The algorithm isolates two 16 msec  
216 windows from the voltage response: i) just prior to the first decrease and, ii) just prior to the first  
217 increase. Linear fits for these windows are obtained and extrapolated to the timestamp of the  
218 location of the first decrease to obtain  $V_1$  and  $V_2$  as shown in Fig. 3E. The difference in their  
219 corresponding voltage magnitudes is proportional to the electrical impedance of the tip of the  
220 electrode ( $Z_{tip} = (V_2 - V_1)/1 \text{ nA}$ ).

221

## 222 Tracking electrical impedance of the tip of GP microelectrode as it approaches a neuron

223 To evaluate the efficacy of the electrical impedance of the tip of GP microelectrode as a  
224 feedback variable for the autonomous positioning algorithm, we used the model (Fig. 3B) to  
225 predict the electrical impedance of the GP microelectrode approaching a neuron. The increase  
226 in proximity of the electrode to a neuron was modeled as an increase in seal resistance from 0.1  
227 M $\Omega$  to 1 G $\Omega$ . For each  $R_{seal}$ , voltage output of the model in response to 1 nA input current pulses  
228 (50 msec ON, 2 sec OFF) was predicted and the electrical impedance of the electrode tip was  
229 calculated from the corresponding voltage response using the algorithm shown in Fig. 3E. The  
230 change in electrical impedance of the electrode tip (subtracted from the initial value of electrical  
231 impedance of the electrode tip for  $R_{seal} = 0.1 \text{ M}\Omega$ ) plotted against  $R_{seal}$  is shown in Fig. 4A. For  
232 values of  $R_{seal} < 250 \text{ M}\Omega$ , the electrical impedance of the electrode tip increased monotonically  
233 with increase in  $R_{seal}$ . The electrical impedance increased to 21 M $\Omega$  (close to the value of  $R_m$   
234 in the model = 25 M $\Omega$ ) at  $R_{seal} = 250 \text{ M}\Omega$ . For  $R_{seal}$  larger than 250 M $\Omega$  (up to 1 G $\Omega$ ), only marginal  
235 increase in the electrical impedance was predicted. Predicted voltage responses of the model to  
236 1 nA current pulses for 5 increasing values of  $R_{seal}$  are also shown in Fig. 4A.

A

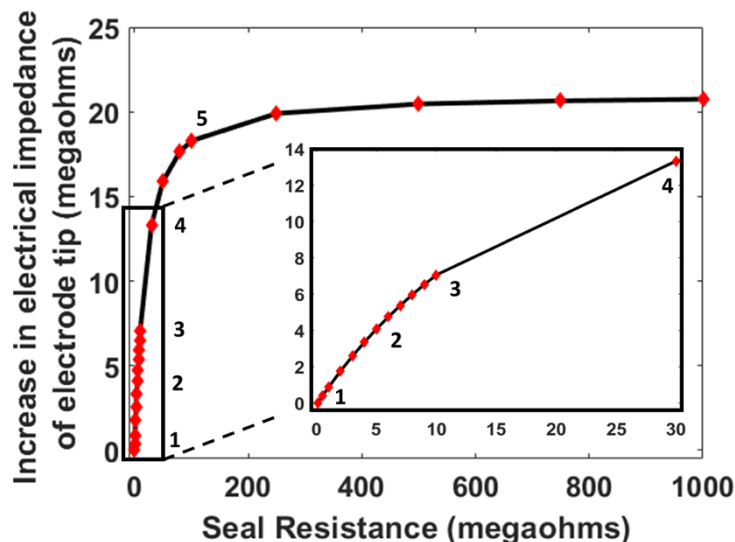

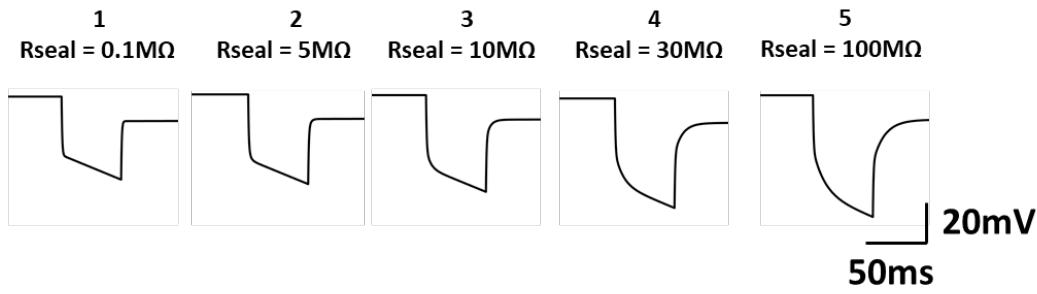

B

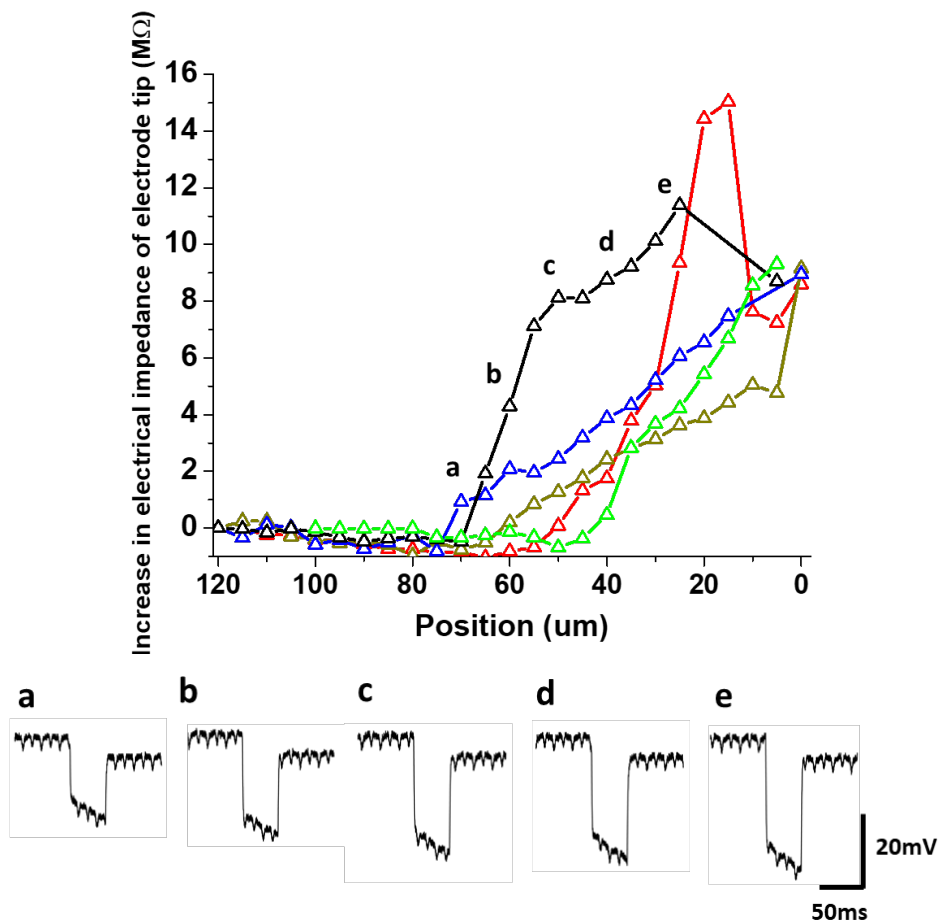

**Fig.4:** Electrical impedance of the tip of GP microelectrode as it approaches a neuron in the isolated abdominal ganglion. (A) The decreasing distance between electrode and neuronal membrane was simulated by increasing the seal resistance,  $R_{seal}$ . ) For each  $R_{seal}$ , voltage response of the GP microelectrode to a 1 nA current pulse was predicted and the electrical impedance of the electrode tip was measured using the algorithm in Fig. 3E. The voltage responses predicted by the model for five increasing values of  $R_{seal}$  is shown below. (B) Experimental measurements of change in electrical impedance of the tip of the GP microelectrodes with increase in proximity to a neuron ( $n = 5$  neurons).

The increase in electrical impedance began 45-70  $\mu\text{m}$  before successful cell penetration across the five electrodes. The recorded voltage responses of an electrode at 5 different positions of the electrode with respect to a neuron is shown in the lower trace.

237 Experimental measurements of electrical impedance of the tip of the GP microelectrodes  
238 ( $n = 5$ ) as they approached abdominal ganglion neurons (5 cells) validated the impedance trend  
239 predicted by the model (Fig. 4B). Electrical impedance of the tip of the electrodes at each  
240 position was computed from the recorded voltage responses to 1 nA pulses (50 msec ON, 2 sec  
241 OFF) using the algorithm described in Fig. 3E. Position '0  $\mu\text{m}$ ' indicates the location where there  
242 was successful penetration of neuron and intracellular signals were observed for the first time.  
243 In 2 out of 5 electrodes, we were unable to record electrical impedances at the tip of the GP  
244 microelectrode at '0  $\mu\text{m}$ ' position. For all GP microelectrodes, electrical impedance of the tip  
245 increased to  $> 8 \text{ M}\Omega$  before successful penetration of cell membrane. The increase in electrical  
246 impedance began 45-70  $\mu\text{m}$  before successful cell penetration across the five electrodes. The  
247 monotonic increase in electrical impedance of the electrode tip indicated that it can be reliably  
248 used to detect proximity to a cell. Recorded voltage responses at 5 different locations of an  
249 electrode with respect to a neuron are also shown in Fig. 4B.

250 Closed loop control validation using GP microelectrode and conventional microdrive

A

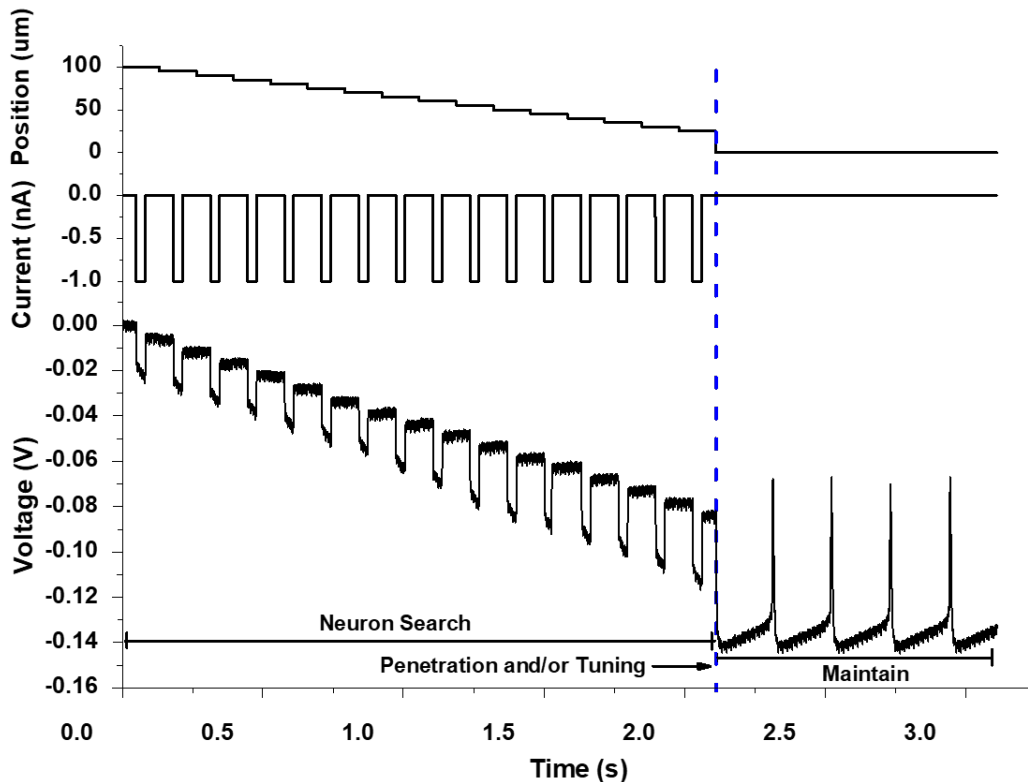

B

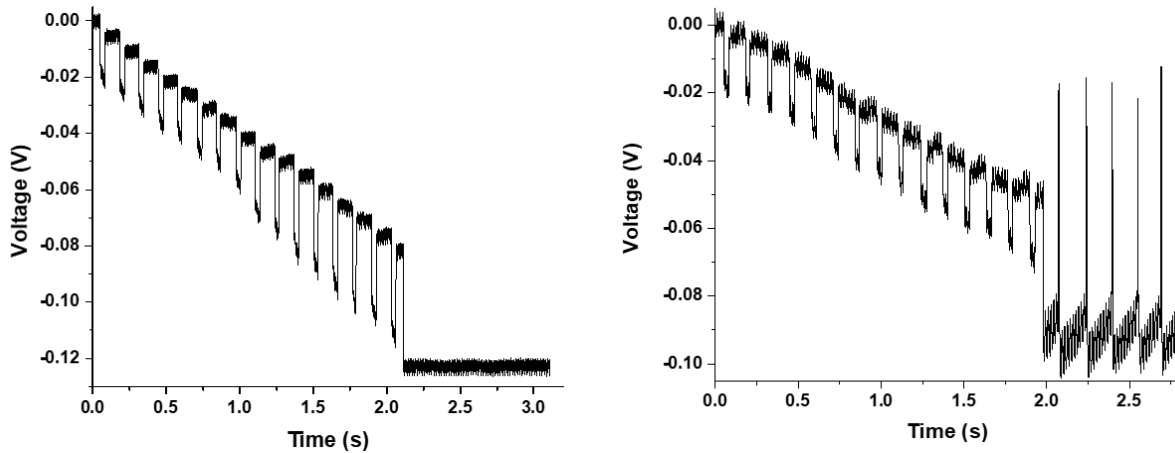

**Fig.5:** Validation of the closed-loop control after integration of controller with a GP microelectrode and a conventional hydraulic microdrive. (A) Illustration of a typical trial of the closed loop control - the controller moved the electrode using the microdrive in steps of  $5\ \mu\text{m}$  towards a neuron in the isolated abdominal ganglion, until the electrical impedance of the tip was above the threshold value of  $8\ \text{M}\Omega$ , beyond which the controller switched to the ‘Penetration and/or Tuning’ mode to impale the neuron and obtained intracellular recordings. (B) Representative plots showing performance of the controller in 2 additional neurons with good quality resting potentials (RP) and/or action potentials (AP).

251 As a first step in the validation, the closed loop controller was integrated with a GP  
252 microelectrode and a conventional hydraulic microdrive in the closed-loop scheme outlined in  
253 Fig. 8A. A typical trial using this integrated system is illustrated in Fig. 5A. When the controller  
254 was initiated, it operated in the ‘neuron search’ mode and moved the electrode in  $5\ \mu\text{m}$  steps  
255 while measuring electrical impedance of the tip and membrane potential after each step. As  
256 soon as the electrical impedance of the electrode tip increased above the set threshold ( $8\ \text{M}\Omega$   
257 for this trial), the controller switched to the “penetration and/or tuning” mode and moved the  
258 electrode by  $20\ \mu\text{m}$  at a speed of  $40\ \mu\text{m/s}$  to enable penetration. Subsequently, the controller  
259 transitioned to the ‘Maintain’ mode as soon as good quality intracellular signals (RP  $< -35\ \text{mV}$   
260 and/or AP  $> 60\ \text{mV}$ ) were recorded. The performance of the controller in 2 additional neurons is  
261 demonstrated in Fig. 5B. In each trial, the controller successfully isolated and penetrated a  
262 neuron as well as obtained good quality electrical recordings. It should be noted that the  
263 controller moved the electrode by one step every 30 sec in the ‘neuron search’ mode. The ‘time’  
264 axis in the plots have been truncated to better represent the increase in electrical impedance of  
265 the electrode tip over successive steps during the ‘neuron search’ mode. The actual time taken  
266 by the algorithm to move the electrode by  $80\ \mu\text{m}$  was 7.5 min.

#### 267 Forces required to penetrate neurons in the abdominal ganglion of *Aplysia Californica*

268 To assess the ability of electrothermal microactuators to penetrate single neurons in the  
269 abdominal ganglion of *Aplysia Californica*, we measured the forces required to penetrate the  
270 neurons with a GP microelectrode at different electrode movement speeds. Fig. 6A shows  
271 simultaneous recordings of force and voltage during insertion and removal of a GP  
272 microelectrode from a neuron. Fig. 6A(i) shows the forces acting on the GP microelectrode  
273 during different stages of electrode interaction with the cell. During downward movement of  
274 electrode into the cell, forces were registered as negative values by the load cell due to  
275 compression. During upward movement of electrode out of the cell, forces were registered as

276 positive values due to tension. There was minimal relaxation of neuronal membrane around the  
277 electrode ( $<10 \mu\text{N}$ ) after successful penetration of neurons over the duration of our force  
278 recordings. Forces required to penetrate the neuron was therefore, measured as the maximum  
279 decrease in the force curve. Only neurons from which good quality intracellular potentials were  
280 recorded upon penetration were included in the experiment. Penetration forces were measured  
281 from  $n=5$  neurons (3 animals) for 7 different electrode movement speeds. For 1 of the 5  
282 neurons, we were able to measure penetration forces only for 3 different speeds. Only one trial  
283 was performed at a given speed to reduce damage to the neuron due to repeated penetration.  
284 We did not observe any significant trend in the measured forces as a function of penetration  
285 speed in a given neuron (Fig. 6B). Therefore, force measurements from 3 different speeds were  
286 pooled and box-whisker plots of penetration forces for the five neurons are shown in Fig. 6C.  
287 The median forces required for the penetration of five neurons tested were  $32 \mu\text{N}$ ,  $60 \mu\text{N}$ ,  $143 \mu\text{N}$ ,  
288  $75 \mu\text{N}$  and  $152 \mu\text{N}$  indicating a possible dependency on cell-type. Tukey test results for  
289 pairwise comparisons of mean penetration forces for the five neurons showed that the forces  
290 were significantly different for 8 out of 10 pairs of neurons ( $p < 0.05$ ) (Fig. 6D). The force  
291 generated by the electrothermal microactuators during one stroke has been estimated from our  
292 previous studies to be  $111 \mu\text{N}$  per electrothermal strip [25]. The actuators used in this study had  
293 at least 2 electrothermal strips and were capable of generating a force of  $222 \mu\text{N}$ , which was  
294 significantly higher than the forces required to penetrate abdominal ganglion neurons.

295

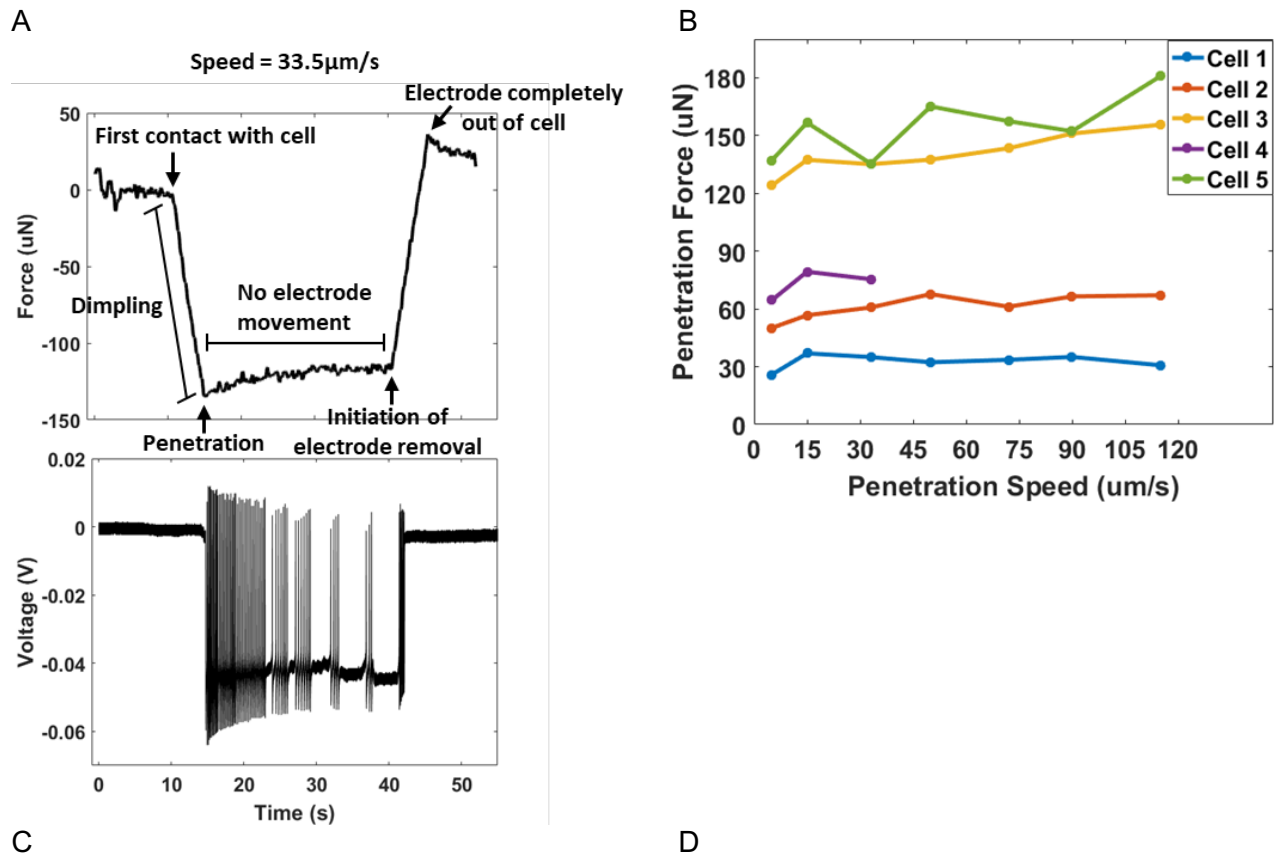

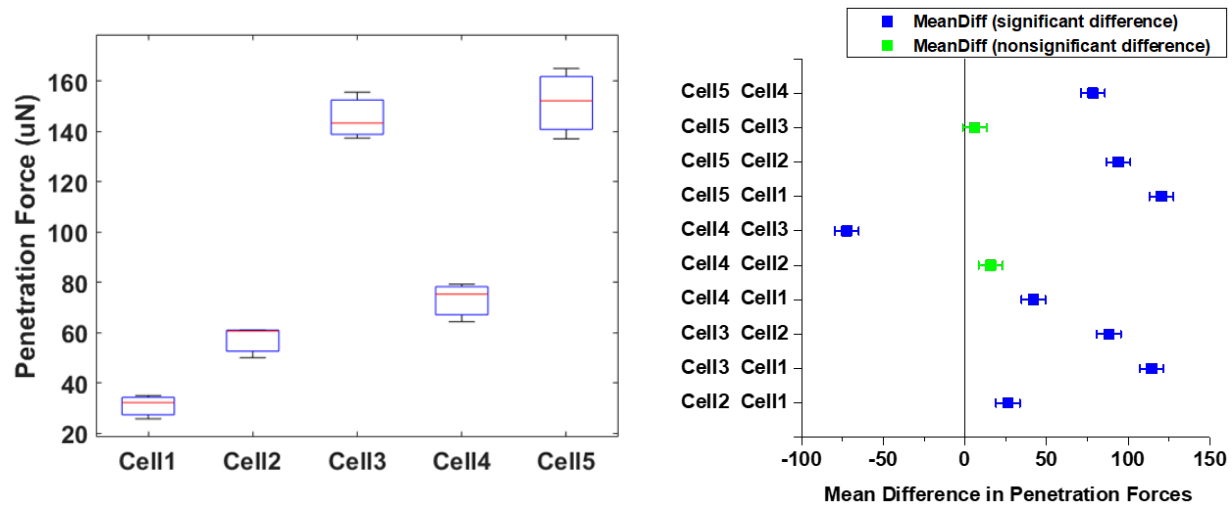

**Fig.6:** Cell penetration forces in the neurons of isolated abdominal ganglion show significant variation among neurons with median forces ranging from 32-152 µN. (A) Simultaneous force and voltage recording during insertion and subsequent removal of a GP microelectrode from cell. (B) Penetration forces showing minimal variability across different electrode movement speeds in n=5 neurons. (C) Box-whisker plots of penetration forces measured for 5 different neurons in the abdominal ganglion. (D) Tukey test results for pairwise comparisons of mean penetration forces for all neurons tested. The forces were significantly different for 8 out of 10 pairs of neurons ( $p < 0.05$ ).

296

## 297 Validation of closed loop control integrated with the MEMS-based microactuators

298 In the final set of closed loop control experiments, the closed-loop controller was  
299 integrated with the 2 MEMS-based sub-systems - the GP microelectrode and electrothermal  
300 microactuators. In the 'neuron search' mode, the controller moved the electrode towards a cell  
301 in 6.5 µm steps using the microactuators. After an increase in electrical impedance of the tip of  
302 the electrode above threshold (6 MΩ), the controller autonomously penetrated the cell with a  
303 continuous 26 µm movement (speed = 40 µm/s), before switching to the 'maintain' mode during  
304 which good quality intracellular recordings were observed as shown in Fig. 7A. The controller,  
305 integrated with the MEMS-based sub-components, repeatably searched, penetrated and  
306 recorded high fidelity intracellular potentials from 3 different abdominal ganglion neurons as  
307 shown in Fig. 7. As noted before, the 'time' axis in the plots have been truncated to show the  
308 increase in electrical impedance of the tip of the GP microelectrodes across steps. The actual  
309 time taken by the controller to move the electrode by 80 µm using the microactuators was 6 min.

## 310 Comparison of controller performance with conventional microdrive vs electrothermal 311 microactuators

312 Fig. 7C compares the performance of the controller integrated with the conventional  
313 hydraulic microdrive system (5 neurons) with that of the controller integrated with the  
314 electrothermal microactuator system (5 neurons). In all neurons, the recordings were terminated  
315 15 min after the initiation of the 'maintain' mode to perform more trials. With both motors, the  
316 controller was successful in 4 out of 5 neurons (80% yield). The quality of recordings obtained  
317 after autonomous penetration of neurons with the two different systems were comparable.  
318 There was no statistically significant difference between the means of recording (RP and peak-



319 peak AP) amplitudes obtained with the two different systems (RP:  $p>0.2$ , AP:  $p>0.1$ ). Further,  
320 the maximum absolute change in peak-peak amplitudes of AP over the duration of 15 min in  
321 'maintain' mode were not significantly different for the two systems ( $p>0.2$ ).

A

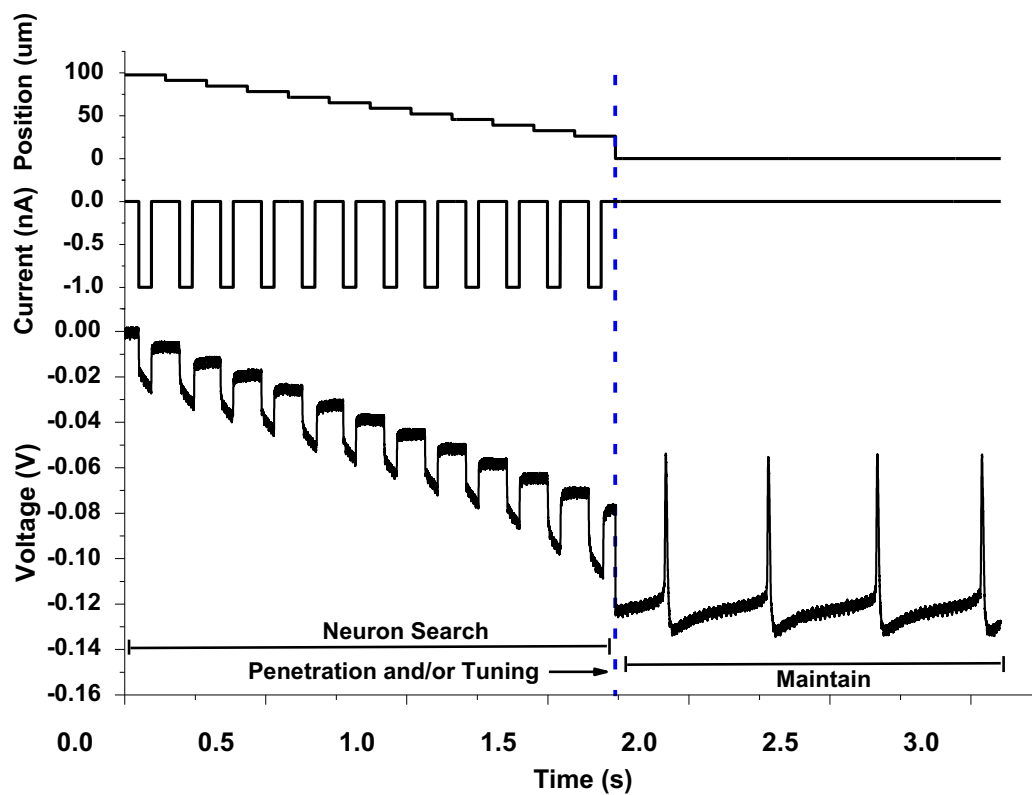

B

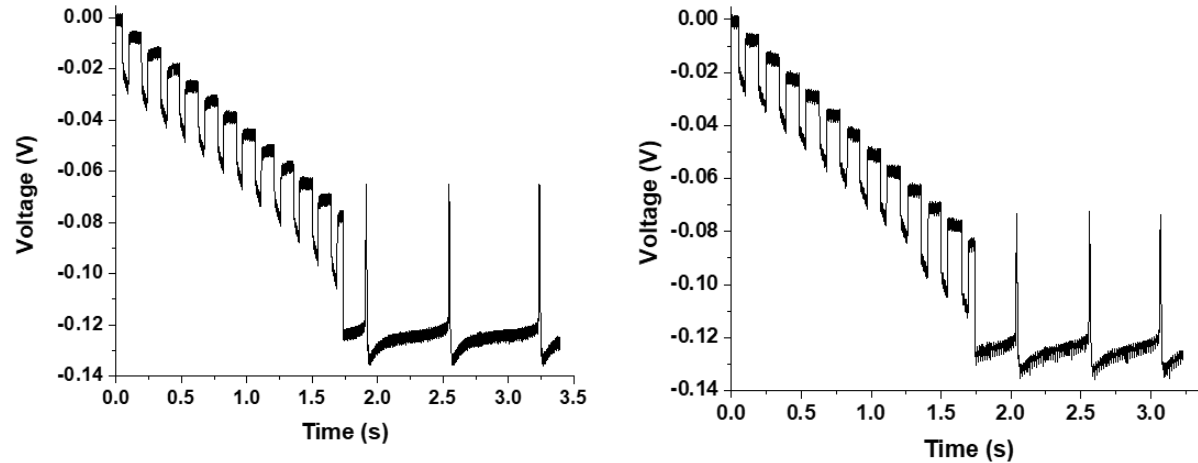

C

|                                                                                                           | w/ conventional microdrive | w/ electrothermal microactuators |
|-----------------------------------------------------------------------------------------------------------|----------------------------|----------------------------------|
| <b>% Success</b>                                                                                          | <b>80</b>                  | <b>80</b>                        |
| <b>Avg. amp. of RP (mV)</b>                                                                               | <b>-43.16</b>              | <b>-39.9</b>                     |
| <b>Avg. peak-peak amp. of AP (<math>V_{p-p}</math>) (mV)</b>                                              | <b>80.31</b>               | <b>75.04</b>                     |
| <b>Avg. abs. change in peak-peak amp. of AP (<math>\Delta V_{p-p}</math>) during 'maintain' mode (mV)</b> | <b>3.2</b>                 | <b>4.07</b>                      |
| <b><math>\Delta V_{p-p}/V_{p-p}</math> (%)</b>                                                            | <b>4%</b>                  | <b>5.4%</b>                      |

**Fig.7:** Validation of closed loop controller integrated with the two MEMS-based sub-components - GP microelectrode and electrothermal microactuators. (A) A typical trial of the closed-loop controller - the controller moved the electrode using the electrothermal microactuators in steps of  $6.5 \mu\text{m}$  towards a neuron until the electrical impedance of the electrode tip was below the threshold value of  $6 \text{ M}\Omega$ , after which the controller switched to the 'penetration and/or tuning' mode to autonomously penetrate the neuron and record intracellular potentials. (B) Two additional trials demonstrating ability of the controller and microactuators to successfully locate and penetrate 2 separate neurons. (C) Comparison of performance of the controller with the conventional microdrive (5 neurons) vs. electrothermal microactuators (5 neurons) showed no significant difference in RP, AP,  $\Delta V_{p-p}$  between the two systems ( $p > 0.1$  in all cases).

322

## 323 Discussion

324 This study demonstrates a fully autonomous, MEMS-based intracellular recording  
 325 system that integrates a polysilicon-based microelectrode, microscale electrothermal actuators  
 326 and closed-loop control for intracellular recordings from single neurons. The system has been  
 327 validated in the abdominal ganglion neurons of *Aplysia Californica*, and will be further validated  
 328 in vivo rodent experiments in the future. The form factor of the current system will allow it to be  
 329 mounted on the head of a rodent in long-term experiments meeting the long-standing need for a  
 330 head-mountable, autonomous intra-cellular recording system.

331

332 We first demonstrated the ability of the GP microelectrode to record high fidelity  
 333 intracellular signals from abdominal ganglion neurons (Figs. 2A, 2B) as well as the motor cortex

334 of a rat in vivo (Fig. 2C). The short in vivo recording, spanning 7 sec, was possibly recorded  
335 from a glial cell rather than a motor neuron based on the marginally hyperpolarized resting  
336 potential (-74 mV) and absence of action potentials [29], [30]. Further rigorous evaluation of the  
337 ability of this GP microelectrode to reliably record from neurons in vivo is required.

### 338 Forces required to penetrate the *Aplysia Californica* neurons

339 In order to evaluate the force demands on the electrothermal microactuators, the forces  
340 required to penetrate neurons of *Aplysia Californica* using GP microelectrodes were measured.  
341 Neuron-penetration forces ranged 32  $\mu\text{N}$  to 152  $\mu\text{N}$  in this study (Fig. 6C). Previous studies  
342 report a large range of penetration forces across various live cell types ranging from < 1 nN to  
343 30 nN [31]–[36]. These studies typically used rigid AFM probes with a variety of tip shapes  
344 (pyramidal, conical, cylindrical), lengths of 6-10  $\mu\text{m}$  and tip diameters of 30-300 nm to penetrate  
345 plated cells with heights of 5-10  $\mu\text{m}$ . The current study used GP microelectrodes 5-6 mm long  
346 having conical-frustum-shaped tips of ~500-600 nm O.D. Angle et al [31] and Obataya et al [32]  
347 measured higher penetration forces with increase in tip dimensions of the probes. Neurons of  
348 *Aplysia Californica* are large (250-600  $\mu\text{m}$  diameter) with heights comparable to their diameters  
349 as they were not plated. Yokakowa et al [38] and Guillaume-Gentil et al [34] reported increase in  
350 penetration forces with increase in height/size of cells for the same probe. Therefore, we  
351 speculate that the large magnitude of forces observed here may have been the result of larger  
352 tip sizes of the electrode, larger diameters and heights of neurons used in this study. We used  
353 four different electrodes to obtain penetration forces from five different neurons 250-500  $\mu\text{m}$  in  
354 diameter (3 animals). The large variation in the measured forces across neurons can be  
355 attributed to a variety of factors, such as electrode-to-electrode variability, location of electrode  
356 with respect to cell soma (center vs. corner), size of cell, health of cell, location of cell in  
357 ganglion (how tethered it is) and effect of protease (for digestion of connective tissue sheath  
358 covering the ganglion) on neuronal membrane stiffness. Angle et al. [31] also observed large  
359 variations in measured forces (~3.2–32 nN) using rigid AFM probes for a given cell type,  
360 electrode type and experimental conditions. Similar penetration forces across a range of  
361 penetration speeds 5 – 125  $\mu\text{m}/\text{s}$  (Fig. 6B) suggest that the neuronal membrane breaks down  
362 above a certain stress, irrespective of the strain rate within the penetration speeds tested here.  
363 Interestingly, Kawamura and colleagues noted that the approach velocity (1-1000  $\mu\text{m}/\text{s}$ ) of AFM  
364 nanoneedle probes had no significant effect on the success rate of penetration of HeLa cells  
365 [39]. At penetration speeds of 5 – 125  $\mu\text{m}/\text{s}$ , force data in the current study suggests that the  
366 *Aplysia Californica* neurons indented by approximately half their diameter (150-300  $\mu\text{m}$ ) before  
367 penetration. Yokokowa et al. [38] reported a positive correlation between cell height and  
368 indentation depth prior to cell penetration for the same probe. The lack of any significant  
369 relaxation in forces after neuronal penetration indicate that the neuronal membrane remains  
370 dimpled over the duration of our force recordings lasting up to 10 mins, possibly due to the tight  
371 seal between glass and cell membrane. Prolonged dimpling of cell may have implications on the  
372 functional state of cell, such as activation of membrane stretch receptors.

### 373 Electrical impedance of the tip of GP microelectrode

374 Simulation results (Fig. 4A) suggest that the increase in electrical impedance of the tip of  
375 the electrode is an effect of increasingly tight coupling between the electrode and neuron, due to  
376 which larger fraction of the current being applied to the electrode (to estimate electrical  
377 impedance of the tip of the electrode) flows through the cell (via the membrane) and smaller

378 fraction flows through the extracellular space. The increase in electrical impedance of the  
379 electrode tip was close to the membrane resistance ( $R_m$ ) of the cell for values of  $R_{seal} > 250 \text{ M}\Omega$ ,  
380 indicating maximum electrode-neuron coupling and most of the current was flowing through the  
381 cell. Increase in electrical impedance of the tip of conventional patch and sharp glass  
382 micropipettes has been reliably used to detect neuron proximity in vivo [8], [10]–[12]. In the  
383 current study, experimental measurements of electrical impedance of the tips of GP  
384 microelectrodes increased monotonically to  $> 8 \text{ M}\Omega$  over a distance of 45-70  $\mu\text{m}$  before  
385 successful penetration of the neurons (Fig. 4B). In contrast, Ota et al. [11] observed similar  
386 increases in electrical impedance of the tips of sharp micropipettes over smaller distances of 10-  
387 20  $\mu\text{m}$  before penetration of mouse cortical neurons in vivo. The large size of *Aplysia Californica*  
388 neurons (250-500  $\mu\text{m}$  in diameter) and larger indentation depth (150-300  $\mu\text{m}$ ) before  
389 penetration likely caused the electrical impedance to increase over larger distances before  
390 penetration than prior studies. Here, five different electrodes were used to record electrical  
391 impedances from five different cells. The large variation in electrical impedances across the 5  
392 different GP microelectrodes in Fig. 4B and the distance over which the impedance increases  
393 (45-70  $\mu\text{m}$ ) could be due to variabilities in size of neurons and location of electrode with respect  
394 to cell soma (center vs corner). We measured cell input resistances of  $\sim 25\text{-}28 \text{ M}\Omega$  in *Aplysia*  
395 *Californica* neurons when full-blown action potentials were recorded (data not included).  
396 However, the increase in electrical impedances at position '0  $\mu\text{m}$ ' in Fig. 4B were much smaller  
397 (8-10  $\text{M}\Omega$ ) possibly because the electrode tips were not completely inside the cells. This was  
398 corroborated by the smaller-amplitude action potentials (10-20 mV) and depolarized resting  
399 potentials (-10 to -15 mV) recorded at that position. Finally, the increase in electrical impedance  
400 as a function of distance from the neuron was not monotonic for a short segment in two of the 5  
401 GP microelectrodes in Fig. 4B. One explanation for this is that the GP microelectrodes in the  
402 above 2 cases might have been slightly off-center with respect to the neuron, which may have  
403 resulted in a change in contact area between the electrode and neuronal membrane with  
404 successive steps.

405 Currently, the controller waits for 30 sec between successive electrode movements to  
406 allow for the charge buildup at the polysilicon-KAc interface upon application of 5 consecutive  
407 pulses of 1 nA (50 msec ON, 2 sec OFF) for measurement of electrical impedance of the tip of  
408 the microelectrode to discharge completely. Therefore, the time taken to move the electrode by  
409 100  $\mu\text{m}$  would be  $\sim 7.5 \text{ min}$  (with the electrothermal microactuators) or 10 min (with the  
410 conventional motorized micromanipulator). The wait-time between steps can be potentially  
411 minimized by using biphasic, charge-balanced current pulses for measurement of electrical  
412 impedance of the tip of the microelectrode. Further, our data also indicates that the 1 nA  
413 currents used for impedance measurements did not alter the interface in any measurable way.  
414 Electrochemical impedance spectra of the GP microelectrode before and after continuous  
415 application of 1500 pulses (50 msec ON, 5 sec OFF) of 1 nA did not show any significant  
416 changes as assessed by their NRMSE values. Visual inspection of the GP microelectrode under  
417 the microscope showed no bubbles, indicating that the currents applied were well within the  
418 electrochemical window of KAc and did not result in electrolysis in the miniaturized glass  
419 micropipette. Further, high fidelity recordings as well as minimum change in the peak-peak  
420 amplitudes of AP of the recorded signals during 'maintain' mode of the controller in 8 neurons  
421 (Fig. 7C) indicate that the charging and discharging events had no adverse effects on the  
422 neurons being recorded from. The long-term stability of the interface has to be carefully  
423 evaluated in future in vivo studies.

424 Comparison of the closed-loop controller with conventional microdrives versus one integrated  
425 with the electrothermal microactuator

426 Both types of closed-loop control systems were successful in 4 out of 5 neurons (Fig.  
427 7C). The failed trial with the conventional microdrive had a GP microelectrode tip clogged with  
428 biological debris, which obscured the electrical impedance feedback. In the failed trial with the  
429 electrothermal microactuators, the GP microelectrode did not penetrate cell at the end of the  
430 'penetration' mode even though the hallmark increase in electrical impedance of the tip of the  
431 electrode was observed. This could have been a result of the electrode contacting the corner of  
432 the cell at a more grazing angle resulting in unsuccessful penetration. The quality and stability of  
433 intracellular recordings (RPs and APs) obtained with the closed-loop controller using the  
434 electrothermal microactuators were equivalent to those obtained with the conventional  
435 microdrive (Figs. 5 & 7), indicating that the functional impact on the neurons due to successful  
436 penetration and stable maintenance of the GP microelectrode inside the neurons was  
437 comparable using both systems. A change in AP amplitudes when electrode is kept stationary  
438 within cell can be attributed to several reasons: 1) membrane slowly resealing around the  
439 electrode, 2) dysfunction induced by penetration and maintenance of electrode inside neuron  
440 and 3) possibility of drifts in the positioning systems or the neurons in the media. Similar change  
441 in AP amplitudes during 'maintain' mode with the two different closed-loop systems indicate that  
442 the electrothermal microactuators and conventional microdrives have comparable positioning  
443 drift and holding force. All the trials with the actuators showed an increase in the AP amplitudes  
444 with time, suggesting that resealing of the neuronal membrane around the GP microelectrode  
445 may have been the main contributor. We have observed similar changes in the AP amplitudes  
446 (2-5 mV) from *Aplysia Californica* neurons with conventional glass micropipettes.

447 This miniaturized, robotic system offers several significant advantages for potential use  
448 in vivo. The overall dimensions of the system (electrodes + positioning components) before  
449 packaging are 3 mm x 6.3 mm x 1 mm and weight is ~35 mg, which makes it head-mountable  
450 for recordings from unrestrained, behaving animals such as rodents and non-human primates.  
451 Using conventional wire-bonding approaches for packaging, the system used in this study had a  
452 slightly large footprint (1.78 cm x 1.46 cm x 0.5 cm) for 3 independently movable GP  
453 microelectrodes. Using flip-chip based packaging methods reported earlier, the size can be  
454 further reduced to chip-scale [40], [41] and help realize higher channel counts (with tens and  
455 hundreds of GP microelectrodes) and throughput in future designs. Our current design  
456 accommodates 3 intracellular electrodes per chip, spaced approximately 800  $\mu\text{m}$  apart. In future  
457 designs, the spacing between the electrodes can be further reduced to approximately 400  $\mu\text{m}$   
458 by using optimal 3D chip-stacking strategies. Our previous characterization study [25] showed  
459 that the actuators are robust and have consistent stepping over 4 million cycles of operation in  
460 bench-top experiments. The electrothermal actuators also generate enough force to penetrate  
461 and navigate the electrode through brain tissue [25], [26], [42]. The use of electrothermal  
462 microactuators allows for robust and reliable microscale movement of individual electrodes  
463 within brain tissue also. We have already demonstrated the reliability of these electrothermal  
464 microactuators in long-term rodent experiments where we tested the ability of these  
465 microactuators to maintain a stable extra-cellular interface with single neurons in the in vivo  
466 brain over periods lasting as long as 13 weeks [42]. However, the ability of these electrothermal  
467 microactuators to isolate and precisely penetrate neurons in vivo has to be validated carefully in  
468 future experiments.

469 Further, movable intracellular probes can be repositioned to seek new neurons in a  
470 given region in the event of loss of signal, even after implantation. Also, electrothermal  
471 microactuators can help improve the stability of intracellular recordings by incorporating control  
472 strategies such as those reported by Fee [15], where the intracellular electrode was moved  
473 along with the neuron to compensate for brain micromotion. Integration of a microscale, head-  
474 mountable positioning system such as the one reported here with the closed-loop automation  
475 algorithm for neuron isolation and penetration makes the system plug-and-play and thereby  
476 usable by several neurophysiology labs. This system can also be used for other applications  
477 such as current injection, dye labeling and targeted delivery by loading the miniaturized glass  
478 micropipettes with dyes or pharmaceutical agents.

479 In the current design, the GP microelectrode has a length of 5-6 mm from the edge of  
480 the chip. The electrode can be extended further by 2.5-3 mm using the electrothermal  
481 microactuators. Therefore, the electrode can be used to record intracellular activity from cortical  
482 as well as deep brain areas in rodents in vivo. There is a 2 mm overlap between the polysilicon  
483 electrodes and miniaturized glass micropipettes, due to which the full translation range of the  
484 microactuators is reduced to <3 mm. This can be improved by increasing the length of our  
485 polysilicon microelectrodes in future designs. A significant challenge that remains to be  
486 addressed is preventing clogging of tips of the miniaturized glass micropipettes of the GP  
487 microelectrodes with debris. With the current design, the miniaturized micropipette has to be  
488 replaced in the event of tip clogging. We are investigating alternative designs of polysilicon-  
489 based intracellular probes. The electrothermal microactuators have a displacement resolution of  
490 6.5  $\mu\text{m}$ , which is slightly larger than the typical step sizes used by neuroscientists when seeking  
491 neurons for intracellular recording in vivo (2-3  $\mu\text{m}$ ). The larger displacement resolution can  
492 potentially reduce the number of neurons we can sample/ record from. In order to increase our  
493 probability of penetrating neurons using the microactuators, the control algorithm can be  
494 modified to use extracellular voltage recording as an additional feedback variable, as it can  
495 detect neuron proximity before an electrode makes physical contact with a neuron (which  
496 causes an increase in electrode electrical impedance of the tip of the electrode). Finer  
497 displacement resolution can be readily achieved in future designs by reducing the spacing  
498 between the teeth along the sides of the polysilicon electrode and by using appropriate  
499 transmission gears between the electrothermal microactuators and polysilicon microelectrodes.

## 500 **Methods**

### 501 Fabrication of the electrothermal microactuators and microelectrodes

502 The electrothermal microactuators and microelectrodes were fabricated by surface  
503 micromachining polysilicon using the SUMMiTV™ (Sandia Ultra-planar Multi-level MEMS  
504 Technology V) process at the Sandia National Laboratories, Albuquerque, NM. The fabrication  
505 process is explained in our earlier study [26]. Briefly, SUMMiTV™ is a five-layer, surface  
506 micromachining process that uses silicon substrate topped with an insulating layer of silicon  
507 dioxide and silicon nitride as the starting material. Five layers of polysilicon deposited over this  
508 base layer make up the mechanical/electrical layers and each layer is separated from the next  
509 by sacrificial silicon dioxide layers. The mechanical components were defined in all the five  
510 layers, while the microelectrodes were defined in polysilicon layers 2 and 3. After all the layers  
511 were micromachined, the devices were released in HF to remove the sacrificial oxide layers  
512 (wet-oxide etch). Anchor points established electrical and mechanical connections between the  
513 different polysilicon layers after the oxide layers were removed. Spring-type leads made

514 electrical connections between the moving microelectrodes and stationary bond-pads. The  
515 polysilicon microelectrodes were highly doped ( $10^{21}/\text{cm}^3$ ) in situ with phosphorus (n-type), to  
516 make them highly electrically conductive. The final part after dicing containing three polysilicon  
517 microelectrodes and associated electrothermal microactuators reported in this study have  
518 dimensions of 3 mm x 7 mm. Each of the three polysilicon microelectrodes (50  $\mu\text{m}$  wide, 4  $\mu\text{m}$   
519 thick and 5 mm long) can be moved bi-directionally over 6 mm (forward and backward) with a  
520 displacement resolution of 6.5  $\mu\text{m}$ , by means of the electrothermal microactuators.

#### 521 Packaging of MEMS device

522 A 40-pin chip carrier (Spectrum Semiconductor Materials Inc., San Jose, CA) was diced  
523 on one side, in order to create an opening through which the microelectrodes can extend off the  
524 MEMS chip after it has been bonded to the carrier. The MEMS chip was wire-bonded to the chip  
525 carrier using gold wires. A glass covering was glued to the top of the chip carrier to protect the  
526 device and wire bonding. Then, the chip carrier was bonded to a custom designed PCB using  
527 surface-mount technology. A male omnetics connector (Part # A79040-001, Omnetics  
528 Connector Corporation, MN) was also bonded to the PCB, and it would connect to a female  
529 omnetics connector (Part # A79045-001) integrated with a custom-made connector board to  
530 interface with the intracellular amplifier and data acquisition system, in order to enable computer  
531 control of actuation and recording. The overall dimensions of the packaged device (Fig. 1D) are  
532 1.78 cm x 1.46 cm x 0.5 cm and the weight of the device is ~1.9 grams. After packaging, the  
533 microelectrodes were extended off the edge of the chip to a length of 2 mm.

#### 534 Fabrication of miniaturized glass micropipettes

535 Borosilicate capillary glass tubes (A-M Systems, Carlsborg, WA) with an outer diameter  
536 of 1.5 mm and inner diameter of 0.86 mm were cut into 3-inch pieces. The glass pieces were  
537 cleaned by soaking in 60% nitric acid overnight. Then, they were rinsed in four changes of  
538 deionized water and methanol and dried at 60°C in an oven. Glass micropipettes were pulled  
539 using the horizontal Flaming/ Brown Micropipette P-87 puller (Sutter Instruments, Novato, CA).  
540 The pulling parameters were set such that the micropipettes had a final tip resistance of 10-20  
541 M $\Omega$ . The glass micropipettes were surface-modified through silanization with *N*-(2-aminoethyl)-  
542 3-aminopropyltrimethoxysilane (EDA) (Sigma Aldrich catalog # 440302) in order to reduce  
543 stiction forces between polysilicon and the wall of the miniaturized glass micropipette during  
544 their integration. Briefly, the pulled pipettes were placed in a closed petri-dish and warmed in an  
545 oven at 400°F for an hour. Then, a vial containing 4  $\mu\text{l}$  of EDA was introduced into the closed  
546 petri-dish and pipettes were exposed to the silane vapor for 6 minutes. Following that, the vial  
547 was removed, and the oven door was kept open for about 30 sec to release any excess silane  
548 vapor. Then, the pipettes were baked for another 30 min at 400°F. After silanization, the  
549 electrodes were filled with 2M potassium acetate (KAc) solution that was degassed in a vacuum  
550 chamber for 6 hours. Air pressure was applied by connecting the broad end of the pipettes to an  
551 air power dispenser system, Ultimus I from Nordson Engineering Fluid Dispensing (EFD, part #  
552 7017041) in order to fill the very tip of the pipettes. After filling, the tips of glass micropipettes  
553 (length of 4-5 mm and diameter of about 80-100  $\mu\text{m}$  at the broad end) were carefully broken.  
554

#### 555 Integration of polysilicon microelectrode with miniaturized glass micropipettes

556 The miniaturized glass micropipette was carefully mounted at the end of a vacuum pick-  
557 up syringe, which was mounted on a 3-axis manual micromanipulator (ALA Instruments). The  
558 MEMS device with the extended polysilicon microelectrode was placed on a custom-built stage

559 with microscale control in x, y and z directions. The miniaturized pipette and polysilicon  
 560 electrode were aligned using cameras in x, y and z directions and the miniaturized pipette was  
 561 carefully inserted at the end of the polysilicon electrode using the stage controls. After insertion,  
 562 the broad end of the miniaturized pipette was sealed with a two-part silicone gel (3-4680, Dow  
 563 Corning, Midland, MI) mixed in a ratio of 1:1 to prevent rise of electrolyte in the pipette into the  
 564 MEMS device.

A

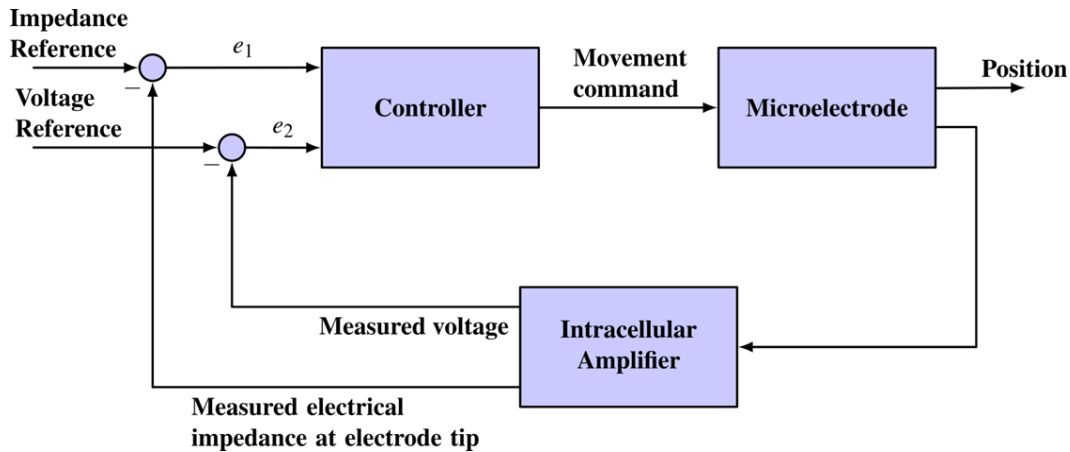

B

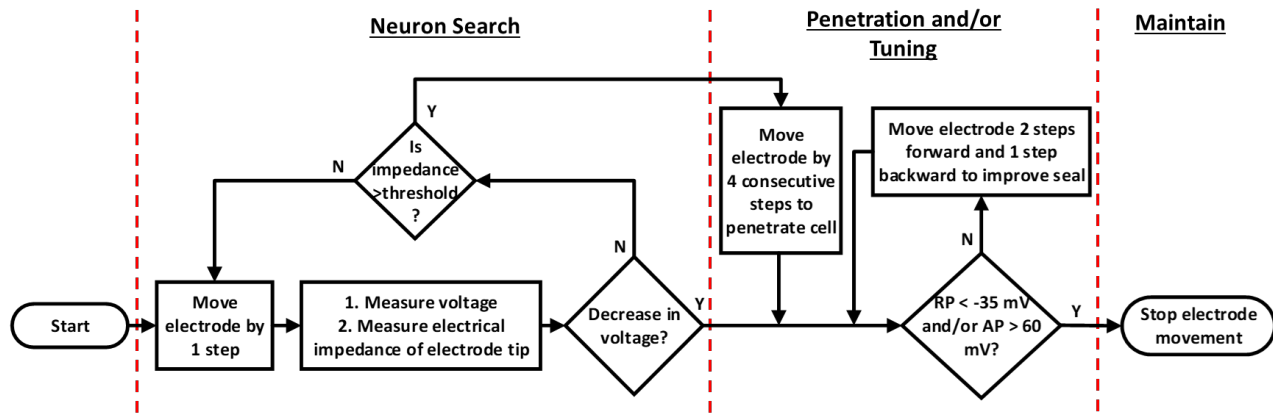

**Fig.8:** Closed loop control algorithm for autonomous movement and positioning of glass-polysilicon microelectrode inside single neurons. (A) Block diagram of the ON-OFF closed-loop control scheme with two feedback variables- electrical impedance of the tip of the electrode at DC and voltage recorded at tip of the electrode (B) Flowchart showing the steps involved in the three modes of the control algorithm: i. Neuron Search mode, ii. Penetration and/or Tuning mode and iii. Maintain mode (RP: Resting Potential, AP: Action Potential)

### 565 Closed loop control algorithm

566 The closed-loop control scheme for autonomous navigation and positioning of  
 567 microelectrodes inside single neurons in the isolated abdominal ganglion of *Aplysia Californica*  
 568 is illustrated in Fig. 8A. This is an ON-OFF controller in which electrical impedance of the  
 569 electrode tip at DC and voltage recorded at the tip of the electrode serve as feedback variables,  
 570 as the electrode is advanced in micrometer steps towards a cell.



571 *Modes of control algorithm*

572 The control algorithm operates in three different modes, as illustrated in Fig. 8B:

573 1) Neuron search: The controller is in the 'neuron search' mode until the electrical impedance of  
574 the tip of the electrode is above a set threshold value or until there is a decrease in recorded  
575 voltage (indicating cell penetration). In this mode, the controller moves the electrode in 6.5  $\mu\text{m}$   
576 steps. There is a 30 sec wait time between movements to measure the electrical impedance of  
577 the tip of the electrode, resulting in a movement speed of 13  $\mu\text{m}/\text{min}$ .

578 2) Penetration and/or tuning: If there is a spontaneous cell penetration at the end of the 'neuron  
579 search' mode and the electrical impedance of the tip of the electrode is above a pre-determined  
580 threshold (indicative of contact with cell membrane from prior experiments), the controller  
581 moves the electrode by 4 consecutive steps of 6.5  $\mu\text{m}$  at a speed of 40  $\mu\text{m}/\text{s}$  to allow cell  
582 penetration. After penetration, the controller evaluates the quality of signals recorded in a 10 sec  
583 segment. If the amplitude of resting potential is  $>-35$  mV and/or the peak-to-peak amplitude of  
584 action potentials is  $<60$  mV, the controller moves the electrode two steps forward and one step  
585 backward to improve quality of recordings.

586 3) Maintain: Once membrane potentials  $<-35$  mV and/or action potentials with peak-to-peak  
587 amplitudes larger than 60 mV are obtained, the controller switches to 'maintain' mode, in which  
588 the position of electrode is kept constant with respect to neuron.

589 Experimental procedures

590 *Animals*

591 *Aplysia Californica* weighing around 50 grams were obtained from the Rosenstiel School  
592 of Marine and Atmospheric Science, University of Miami, Florida. Animals were maintained in  
593 Instant Ocean™ artificial sea water (specific gravity of 1.25) at 13-16°C under 12:12 light-dark  
594 conditions.

595 *Surgical Procedure*

596 Animals were anesthetized by injecting 0.35 M Magnesium Chloride solution (7.7 g/L of  
597  $\text{MgCl}_2$  and 3.6 g/L of HEPES) into the foot process for 5-10 min (equivalent to 30-35% of  
598 animal's body weight). After the animal was distended and relaxed, it was pinned down on a  
599 dissecting dish and an incision was made along the entire length of the foot (from head to tail) to  
600 expose the internal organs and ganglia. The abdominal ganglion was identified and isolated with  
601 a fair amount of connective tissue. The ganglion was washed in artificial sea water (ASW, made  
602 with Instant Ocean™) three times and transferred to a petri-dish containing 2 ml of protease  
603 solution (1 mg/ml of 1 unit/mg Dispase II (Roche Diagnostics Corporation, Indianapolis, IN) in  
604 ASW). The ganglion was incubated in the protease solution at 34-35°C for 45 – 60 min to allow  
605 easy removal of connective tissue. The ganglion was then washed in ASW three times and  
606 placed in a Sylgard™ coated dish filled with ASW. The excessive connective tissue was used to  
607 pin down the ganglion using insect pins. Using surgical scissors (Item # 15000-08, Fine Science  
608 Tools, Foster City, CA) and fine forceps (Item # 500233, World Precision Instruments, Sarasota,  
609 FL), the connective tissue was carefully removed from the ganglion in order to expose the  
610 neurons for intracellular recording.

## 611 *Intracellular recording and Analysis*

612 Intracellular signals were recorded from abdominal ganglion neurons using an Electro  
613 705 Intracellular amplifier (World Precision Instruments (WPI), Sarasota, FL) and the WPI 118  
614 data acquisition system. Silver/silver-chloride pellet electrode (WPI, part # RC1T) was used as  
615 the reference electrode. The data acquisition system was accessed using the software,  
616 Labscribe™. The acquired raw signal was sampled at 10 KHz. All analyses were done in  
617 MATLAB™.

## 618 *Force measurements and Analysis*

619 Force generated by the electrothermal microactuator strips during one stroke has been  
620 estimated in our previous study [25]. Forces required to penetrate neurons in the abdominal  
621 ganglion of *Aplysia Californica* with a GP microelectrode at different penetration velocities were  
622 measured in order to evaluate the ability of electrothermal microactuators to impale cells. A GP  
623 microelectrode was wire-bonded to a custom-designed PCB, which was connected to a custom-  
624 made connector board to interface with the intracellular amplifier. The PCB was attached to a  
625 connecting screw post and mounted on a precision 10 g load cell (Futek, LSB210, Irvine, CA).  
626 The load-cell with the microelectrode set-up was held on a hydraulic micromanipulator  
627 (FHC#50–12-1C, Bowdoin, ME) to move the electrode at different penetration speeds in  
628 randomized trials: 5  $\mu\text{m/s}$ , 15  $\mu\text{m/s}$ , 33.5  $\mu\text{m/s}$ , 50  $\mu\text{m/s}$ , 72  $\mu\text{m/s}$ , 90  $\mu\text{m/s}$  and 115  $\mu\text{m/s}$ . For  
629 every trial, penetration of cell was confirmed from the voltage trace recorded simultaneously  
630 using the intracellular amplifier. Forces experienced by the electrode were acquired by the load-  
631 cell at a sampling rate of 200 samples/sec. The acquired force data was smoothed using a 50-  
632 point moving average window and the peak forces were estimated using MATLAB™. Peak  
633 penetration forces were measured across the 7 speeds in  $n = 5$  neurons and the variability in  
634 forces among neurons was evaluated using 1-factor ANOVA in OriginPro 8.5.1.

## 635 *Measurements of electrical impedance of the electrode tip with increase in proximity to neuron* 636 *(open-loop experiments)*

637 To assess the change in electrical impedance of the tip as an electrode approaches a  
638 neuron, a single GP microelectrode was connected to a bond-pad on a custom PCB, which was  
639 attached to a custom-made connector board to interface with the intracellular amplifier. The  
640 PCB was mounted on a hydraulic micromanipulator (FHC#50–12-1C, Bowdoin, ME), which  
641 moved the microelectrode at 5  $\mu\text{m}$  steps towards a neuron, until the electrode penetrated the  
642 cell (as confirmed by voltage recording). After each step, voltage responses to a set of five  
643 current pulses of 1 nA (50 msec ON, 2 sec OFF) were measured and the corresponding  
644 electrical impedance of the electrode tip were obtained in MATLAB™ using the algorithm in Fig.  
645 3E. The final electrical impedance of the tip of the electrode at each position was calculated as  
646 the average of the five measurements.

## 647 *Closed-loop control validation experiments*

648 An Application Programming Interface (API) developed by iWorx Systems Inc. was used  
649 to enable MATLAB™ to communicate with the WPI 118 data acquisition system. A custom-built  
650 MATLAB™ routine continuously monitored the voltage recorded at the GP electrode tip. The  
651 routine also monitored the electrical impedance of the tip of the electrode at DC utilizing the  
652 same procedure applied for the open-loop experiments. The routine sent commands to WPI

653 118, which triggered the intracellular amplifier to inject current pulses through the electrode tip.  
654 Based on the two feedback variables, movement commands were sent from MATLAB™ to a  
655 custom-built Arduino-based waveform generator. The Arduino system generated the required  
656 activation waveforms for the hydraulic microdrive and subsequently the electrothermal MEMS  
657 microactuators to move the microelectrode towards a neuron, closing the feedback loop.

#### 658 In vivo recording

659 To assess the ability of a GP microelectrode to record intracellular activity in vivo, an  
660 anesthetized, adult Sprague-Dawley 500g male rat was used. All animal procedures were  
661 carried out with the approval of the Institute of Animal Care and Use Committee (IACUC) of  
662 Arizona State University, Tempe. The experiment was performed in accordance with the  
663 National Institute of Health (NIH) guide for the care and use of laboratory animals (1996). All  
664 efforts were made to minimize animal suffering.

#### 665 *Surgery, Implantation and data acquisition*

667 The animal was induced using a mixture of (50 mg/ml) ketamine, (5 mg/ml) xylazine, and  
668 (1 mg/ml) acepromazine administered intramuscularly with a dosage of 0.1 ml/100 g body  
669 weight and maintained using 1-3% isoflurane. The anesthesia state of the animal was monitored  
670 closely throughout the experiment using the toe-pinch test. After mounting the animal on a  
671 stereotaxic frame (Kopf Instruments, Tujunga, CA, USA), a skin incision was performed to  
672 expose the skull. A 1 mm diameter hole with the center point at 3 mm posterior to bregma and  
673 1.5 mm lateral to the midline was drilled using a burr drill. The dura and pia were carefully  
674 removed with a pair of micro scissors and the craniotomy was filled with phosphate buffered  
675 saline. Saline was applied to the exposed brain surface periodically to prevent it from becoming  
676 dry. The ground wire (silver) was wrapped around a metal screw implanted in the skull in the  
677 vicinity of the craniotomy. The GP microelectrode was implanted to a depth of 500  $\mu\text{m}$  in the  
678 motor cortex using a conventional hydraulic micromanipulator. The electrical impedance of the  
679 tip of the electrode was measured before and after implantation to make sure that the tip was  
680 not clogged with debris. The electrode was moved in 2  $\mu\text{m}$  steps at a speed of 3  $\mu\text{m}/\text{s}$  using the  
681 hydraulic micromanipulator to seek neurons. Intracellular signals were acquired at a sampling  
682 rate of 20 KHz using the same set-up used for intracellular recordings from abdominal ganglion  
683 neurons of *Aplysia Californica*.

684

#### 685 **Conclusions**

686 In conclusion, we have developed and validated a miniaturized, robotic, MEMS based  
687 intracellular recording system comprising of glass-polysilicon penetrating microelectrodes,  
688 electrothermal microactuators and closed loop control for autonomous, high fidelity intracellular  
689 recordings from single neurons in the abdominal ganglion of *Aplysia Californica*. We have  
690 demonstrated the ability of glass-polysilicon microelectrodes to record intracellular signals that  
691 are comparable to recordings with conventional glass micropipettes. Further, we have shown  
692 that the success rate of penetration as well as the quality of recordings obtained with  
693 electrothermal MEMS based microactuators are similar to that of conventional stereotactic  
694 positioning systems using similar closed-loop control strategies. After careful in vivo validation in  
695 future experiments, this head-mountable system has the potential to record intracellular activity  
696 from a population of neurons simultaneously during behavior in awake animals due to its small  
697 form factor. This will impact several neurophysiological studies and enable discoveries on brain

698 function and dysfunction. Further, this system will also enable the exciting possibility of  
699 repositioning electrodes in the event of loss of intracellular recordings.

700

## 701 **Acknowledgements**

702 This research was supported by the NIH R21NS084492-01 grant. We would like to thank  
703 Vladislav Voziyanov for his help with the rodent craniotomy surgery, Dr. Arati Sridharan for her  
704 inputs during the fabrication of glass-polysilicon microelectrodes and Dr. Siddharth Kulasekaran  
705 for his help during the design of custom PC Boards. This paper describes objective technical  
706 results and analysis. Any subjective views or opinions that might be expressed in the paper do  
707 not necessarily represent the views of the U.S. Department of Energy or the United States  
708 Government. Sandia National Laboratories is a multi-mission laboratory managed and operated  
709 by National Technology and Engineering Solutions of Sandia, LLC, a wholly owned subsidiary  
710 of Honeywell International Inc., for the U.S. Department of Energy's National Nuclear Security  
711 Administration under contract DE-NA0003525.

712

## 713 **Conflict of interest statement**

714 The authors have no conflict of interest to declare.

## 715 **Author contributions**

716 SSK and JM were involved in the design, development, in vitro and in vivo testing of the glass-  
717 polysilicon interfaces for intracellular recording and closed-loop controllers. SSK and JM were  
718 also involved in the integration and testing of all the microscale subsystems such as the  
719 intracellular penetrating microelectrodes, microscale actuators, control algorithms, packaging  
720 and interconnects. MSB, MO and JM were involved in the development of the microscale  
721 actuators and polysilicon microelectrodes using the SUMMiTV™ (Sandia's Ultraplano Multi-  
722 layer MEMS Technology) process.

## 723 **References**

- 724 [1] S. Crochet and C. C. H. Petersen, "Correlating whisker behavior with membrane potential  
725 in barrel cortex of awake mice," *Nat. Neurosci.*, vol. 9, no. 5, pp. 608–610, 2006.
- 726 [2] S. Crochet, J. F. A. Poulet, Y. Kremer, and C. C. H. Petersen, "Synaptic mechanisms  
727 underlying sparse coding of active touch," *Neuron*, vol. 69, no. 6, pp. 1160–1175, 2011.
- 728 [3] J. Epsztein, A. K. Lee, E. Chorev, and M. Brecht, "Impact of Spikelets on Hippocampal  
729 CA1 Pyramidal Cell Activity During Spatial Exploration," *Science*, vol. 327, pp. 474–477,  
730 2010.
- 731 [4] M. A. Long, D. Z. Jin, and M. S. Fee, "Support for a synaptic chain model of neuronal  
732 sequence generation," *Nature*, vol. 468, no. 7322, pp. 394–399, 2010.
- 733 [5] R. U. Kulkarni and E. W. Miller, "Voltage Imaging: Pitfalls and Potential," *Biochemistry*,  
734 vol. 56, no. 39, pp. 5171–5177, 2017.
- 735 [6] M. A. Long and A. K. Lee, "Intracellular recording in behaving animals," *Curr. Opin.*  
736 *Neurobiol.*, vol. 22, no. 1, pp. 34–44, 2012.
- 737 [7] D. Lee and A. K. Lee, "Whole-cell recording in the awake brain," *Cold Spring Harb.*  
738 *Protoc.*, vol. 2017, no. 4, pp. 265–268, 2017.
- 739 [8] T. W. Margrie, M. Brecht, and B. Sakmann, "In vivo, low-resistance, whole-cell recordings

- 740 from neurons in the anaesthetized and awake mammalian brain,” *Pflugers Arch. Eur. J.*  
741 *Physiol.*, vol. 444, no. 4, pp. 491–498, 2002.
- 742 [9] T. W. Margrie, A. H. Meyer, A. Caputi, H. Monyer, M. T. Hasan, A. T. Schaefer, W. Denk,  
743 and M. Brecht, “Targeted whole-cell recordings in the mammalian brain in vivo,” *Neuron*,  
744 vol. 39, no. 6, pp. 911–918, 2003.
- 745 [10] S. B. Kodandaramaiah, G. T. Franzesi, B. Y. Chow, E. S. Boyden, and C. R. Forest,  
746 “Automated whole-cell patch-clamp electrophysiology of neurons in vivo,” *Nat. Methods*,  
747 pp. 1–6, 2012.
- 748 [11] K. Ota, T. Matsumoto, Y. Yazaki-Sugiyama, T. Suzuki, A. Kamoshida and M. Masanori,  
749 “Automated Intracellular Recording from Multiple Neurons in vivo,” *IEEE Transactions on*  
750 *Electronics, Information and Systems*, vol. 134, no. 10, pp. 1506-1514, 2014.
- 751 [12] N. S. Desai, J. J. Siegel, W. Taylor, R. A. Chitwood, and D. Johnston, “MATLAB-based  
752 automated patch-clamp system for awake behaving mice,” *J. Neurophysiol.*, vol. 114, pp.  
753 1331-1345, 2015.
- 754 [13] X. W. A. Stoy, I. Kolb, G. L. Holst, Y. Liew, A. Pala, B. Yang, E. S. Boyden, X. G. B.  
755 Stanley, and C. R. Forest, “Robotic navigation to subcortical neural tissue for intracellular  
756 electrophysiology in vivo,” *J. Neurophysiol.*, pp. 1141–1150, 2017.
- 757 [14] E. M. Schmidt, N. Mutsuga, J. S. McIntosh, K. Kanda and S. R. Goldstein, “Intracellular  
758 recording from pulsating cerebral cortex,” *Electroencephalography and Clinical*  
759 *Neurophysiology*, vol. 42, pp. 581-583, 1977.
- 760 [15] M. S. Fee, “Active stabilization of electrodes for intracellular recording in awake behaving  
761 animals,” *Neuron*, vol. 27, no. 3, pp. 461–468, 2000.
- 762 [16] A. K. Lee, I. D. Manns, B. Sakmann, and M. Brecht, “Whole-Cell Recordings in Freely  
763 Moving Rats,” *Neuron*, vol. 51, no. 4, pp. 399–407, 2006.
- 764 [17] A. K. Lee, J. Epszstein, and M. Brecht, “Head-anchored whole-cell recordings in freely  
765 moving rats,” *Nat. Protoc.*, vol. 4, no. 3, pp. 385–392, 2009.
- 766 [18] D. Lee and A. K. Lee, “Efficient method for whole-cell recording in freely moving rodents  
767 using ultraviolet-cured collar-based pipette stabilization,” *Cold Spring Harb. Protoc.*, no. 4,  
768 pp. 281–288, 2017.
- 769 [19] M. E. Spira and A. Hai, “Multi-electrode array technologies for neuroscience and  
770 cardiology,” *Nat. Nanotechnol.*, vol. 8, no. 2, pp. 83–94, 2013.
- 771 [20] R. Liu, R. Chen, A. T. Elthakeb, S. H. Lee, S. Hinckley, M. L. Khraiche, J. Scott, D. Pre,  
772 Y. Hwang, A. Tanaka, Y. G. Ro, A. K. Matsushita, X. Dai, C. Soci, S. Biesmans, A.  
773 James, J. Nogan, K. L. Jungjohann, D. V. Pete, D. B. Webb, Y. Zou, A. G. Bang, and S.  
774 A. Dayeh, “High Density Individually Addressable Nanowire Arrays Record Intracellular  
775 Activity from Primary Rodent and Human Stem Cell Derived Neurons,” *Nano Lett.*, vol.  
776 17, no. 5, pp. 2757–2764, 2017.
- 777 [21] M. R. Angle and A. T. Schaefer, “Neuronal recordings with solid-conductor intracellular  
778 nanoelectrodes (SCINeS),” *PLoS One*, vol. 7, no. 8, 2012.
- 779 [22] J. E. Ferguson, C. Boldt, J.G. Puhl, T.W. Stigen, J.C. Jackson, K.M. Crisp, K.A. Mesce,  
780 T.I. Netoff, A.D. Redish, “Nanowires precisely grown on the ends of microwire electrodes

- 781 permit the recording of intracellular action potentials within deeper neural structures”,  
782 *Nanomedicine*, vol. 7, no. 6, pp. 847-853, 2012.
- 783 [23] I. Yoon, K. Hamaguchi, I. V. Borzenets, G. Finkelstein, R. Mooney, and B. R. Donald,  
784 “Intracellular Neural Recording with Pure Carbon Nanotube Probes,” *PLoS One*, vol. 8,  
785 no. 6, pp. 6–11, 2013.
- 786 [24] J. J. Moore, P. M. Ravassard, D. Ho, L. Acharya, A. L. Kees, C. Vuong, and M. R. Mehta,  
787 “Dynamics of cortical dendritic membrane potential and spikes in freely behaving rats,”  
788 *Science*, vol. 355, no. 6331, p. eaaj1497, 2017.
- 789 [25] S. Anand, J. Sutanto, M. S. Baker, M. Okandan, and J. Muthuswamy, “Electrothermal  
790 microactuators with peg drive improve performance for brain implant applications,” *J.*  
791 *Microelectromechanical Syst.*, vol. 21, no. 5, pp. 1172–1186, 2012.
- 792 [26] J. Muthuswamy, M. Okandan, A. Gilletti, M. S. Baker, and T. Jain, “An Array of  
793 Microactuated Microelectrodes for Monitoring Single-Neuronal Activity in Rodents,” *IEEE*  
794 *Transactions on Biomedical Engineering*, vol. 52, no. 8, pp. 1470–1477, 2005.
- 795 [27] A. Hai, J. Shappir, and M. E. Spira, “Long-Term , Multisite , Parallel , In-Cell Recording  
796 and Stimulation by an Array of Extracellular Microelectrodes,” *J. Neurophysiol.*, 104, pp.  
797 559–568, 2010.
- 798 [28] M. A. Ungless, X. Gasull and E. T. Walters, “Long-Term Alteration of S-Type Potassium  
799 Current and Passive Membrane Properties in Aplysia Sensory Neurons Following  
800 Axotomy,” *J. Neurophysiol.*, pp. 2408–2420, 2002.
- 801 [29] F. Amzica and M. Steriade, “Neuronal and Glial Membrane Potentials during Sleep and  
802 Paroxysmal Oscillations in the Neocortex,” *J. Neurosci.*, vol. 20, no. 17, pp. 6648–6665,  
803 2000.
- 804 [30] J. Seigneur, D. Kroeger, D. A. Nita and F. Amzica, “Cholinergic Action on Cortical Glial  
805 Cells In Vivo,” *Cereb. Cortex*, vol. 16, no. 5, pp. 655–668, 2006.
- 806 [31] M. R. Angle, A. Wang, A. Thomas, A. T. Schaefer, and N. A. Melosh, “Penetration of Cell  
807 Membranes and Synthetic Lipid Bilayers by Nanoprobes,” *Biophysj*, vol. 107, no. 9, pp.  
808 2091–2100, 2014.
- 809 [32] I. Obataya, C. Nakamura, S. Han, N. Nakamura and J. Miyake, “Mechanical sensing of  
810 the penetration of various nanoneedles into a living cell using atomic force microscopy,”  
811 *Biosensors and Bioelectronics*, vol. 20, pp. 1652–1655, 2005.
- 812 [33] I. Obataya, C. Nakamura, S. Han, N. Nakamura and J. Miyake, “Nanoscale Operation of  
813 a Living Cell Using an Atomic Force Microscope with a Nanoneedle,” *Nano Lett.*, vol. 5,  
814 no.1, pp. 27-30, 2005.
- 815 [34] O. Guillaume-Gentil, E. Potthoff, D. Ossola, P. Dörig, T. Zambelli, and J. A. Vorholt,  
816 “Force-Controlled Fluidic Injection into Single Cell Nuclei”, *small*, no. 11, pp. 1904–1907,  
817 2013.
- 818 [35] A. Hategan, R. Law, S. Kahn, and D. E. Discher, “Adhesively-Tensed Cell Membranes :  
819 Lysis Kinetics and Atomic Force Microscopy Probing,” *Biophysical Journal*, vol. 85, no.  
820 October, pp. 2746–2759, 2003.
- 821 [36] S. Han, C. Nakamura, I. Obataya, N. Nakamura and J. Miyake, “A molecular delivery

- 822 system by using AFM and nanoneedle,” *Biosensors and Bioelectronics*, vol. 20, pp.  
823 2120–2125, 2005.
- 824 [37] K. Najafi and J. F. Hetke, “Strength Characterization of Silicon Microprobes in  
825 Neurophysiological Tissues,” *IEEE Transactions on Biomedical Engineering*, vol. 37, no.  
826 5, 1990.
- 827 [38] M. Yokokawa, K. Takeyasu, and S. H. Yoshimura, “Mechanical properties of plasma  
828 membrane and nuclear envelope measured by scanning probe microscope,” *Journal of*  
829 *Microscopy*, vol. 232, no. March, pp. 82–90, 2008.
- 830 [39] R. Kawamura, K. Shimizu, Y. Matsumoto, A. Yamagishi, Y. R. Silberberg, M. Iijima, S.  
831 Kuroda, K. Fukazawa, K. Ishihara and C. Nakamura, “High efficiency penetration of  
832 antibody - immobilized nanoneedle through plasma membrane for in situ detection of  
833 cytoskeletal proteins in living cells,” *J. Nanobiotechnology*, pp. 1–9, 2016.
- 834 [40] J. Sutanto, S. Anand, A. Sridharan, R. Korb, L. Zhou, M. S. Baker, M. Okandan and J.  
835 Muthuswamy, “Packaging and Non-Hermetic Encapsulation Technology for Flip Chip on  
836 Implantable MEMS Devices,” *J. Microelectromechanical Syst.*, pp. 1–15, 2012.
- 837 [41] N. Jackson and J. Muthuswamy, “Flexible Chip-Scale Package and Interconnect for  
838 Implantable MEMS Movable Microelectrodes for the Brain,” *J. Microelectromechanical*  
839 *Syst.*, vol. 18, no. 2, pp. 396–404, 2009.
- 840 [42] N. Jackson, A. Sridharan, S. Anand, M. S. Baker, M. Okandan, and J. Muthuswamy,  
841 “Long-term neural recordings using MEMS based movable microelectrodes in the brain,”  
842 *Frontiers in Neuroengineering*, vol. 3, no. June, pp. 1–13, 2010.
- 843
